# Supplementary material for: Global, regional prevalence, incidence and risk factors of knee osteoarthritis in population-based studies
Source: PubMed Central journal article supplement — eClinicalMedicine. 2020 Nov 26;29-30:100587. doi: 10.1016/j.eclinm.2020.100587 (PMC7704420; doi:10.1016/j.eclinm.2020.100587), 2020-11-26
Supplement: mmc4.pdf [file mmc4.pdf]

|                        | Was the target population clearly defined? | Was random sampling method used? | Were the samples at risk representative of the target population? | Were non-responders clearly described? | Were data collection methods standardized? | Was validated criteria used to assess the presence of disease? | Summary item on the overall risk of study bias |
|------------------------|--------------------------------------------|----------------------------------|-------------------------------------------------------------------|----------------------------------------|--------------------------------------------|----------------------------------------------------------------|------------------------------------------------|
| Cooper C 2000          | +                                          | -                                | +                                                                 | +                                      | +                                          | +                                                              | +                                              |
| Driban JB 2020         | +                                          | +                                | +                                                                 | +                                      | +                                          | +                                                              | +                                              |
| Duncan R 2011          | +                                          | +                                | +                                                                 | +                                      | +                                          | +                                                              | +                                              |
| Felson DT 1995         | +                                          | -                                | +                                                                 | +                                      | +                                          | +                                                              | +                                              |
| Gelber AC 1999         | -                                          | -                                | +                                                                 | +                                      | +                                          | +                                                              | +                                              |
| Grotle M 2008          | +                                          | -                                | +                                                                 | -                                      | +                                          | -                                                              | -                                              |
| Mork PJ 2012           | +                                          | +                                | -                                                                 | +                                      | +                                          | -                                                              | -                                              |
| Muraki S 2012          | +                                          | +                                | +                                                                 | +                                      | +                                          | +                                                              | +                                              |
| Murphy LB 2016         | +                                          | +                                | +                                                                 | -                                      | +                                          | +                                                              | +                                              |
| Nishimura A 2011       | +                                          | +                                | -                                                                 | +                                      | +                                          | +                                                              | +                                              |
| Oliveria SA 1995       | +                                          | +                                | -                                                                 | +                                      | +                                          | +                                                              | +                                              |
| Prieto-Alhambra D 2014 | +                                          | +                                | +                                                                 | +                                      | +                                          | +                                                              | +                                              |
| Reijman M 2007         | +                                          | +                                | -                                                                 | +                                      | +                                          | +                                                              | +                                              |
| Sasaki E 2015          | +                                          | -                                | -                                                                 | +                                      | +                                          | +                                                              | +                                              |
| Slemenda C 1998        | +                                          | +                                | +                                                                 | +                                      | +                                          | +                                                              | +                                              |
| Swain S 2020           | +                                          | +                                | +                                                                 | +                                      | +                                          | +                                                              | +                                              |
| Toivanen AT 2010       | +                                          | +                                | -                                                                 | +                                      | +                                          | +                                                              | +                                              |
