# Supplementary material for: Global, regional prevalence, incidence and risk factors of knee osteoarthritis in population-based studies
Source: PubMed Central journal article supplement — eClinicalMedicine. 2020 Nov 26;29-30:100587. doi: 10.1016/j.eclinm.2020.100587 (PMC7704420; doi:10.1016/j.eclinm.2020.100587), 2020-11-26
Supplement: mmc7.pdf [file mmc7.pdf]

| Study                                                         | Events | Total   | Proportion | 95%-CI       | Weight (fixed) | Weight (random) |
|---------------------------------------------------------------|--------|---------|------------|--------------|----------------|-----------------|
| country = Algeria                                             |        |         |            |              |                |                 |
| Haouchat C2014                                                | 84     | 400     | 0.21       | [0.17; 0.25] | 0.0%           | 1.2%            |
| Fixed effect model                                            |        | 400     | 0.21       | [0.17; 0.25] | 0.0%           | ---             |
| Random effects model                                          |        |         | 0.21       | [0.17; 0.25] | ---            | 1.2%            |
| Heterogeneity: not applicable                                 |        |         |            |              |                |                 |
| country = Australia                                           |        |         |            |              |                |                 |
| Minaur N2004                                                  | 26     | 847     | 0.03       | [0.02; 0.04] | 0.0%           | 1.3%            |
| Fixed effect model                                            |        | 847     | 0.03       | [0.02; 0.04] | 0.0%           | ---             |
| Random effects model                                          |        |         | 0.03       | [0.02; 0.04] | ---            | 1.3%            |
| Heterogeneity: not applicable                                 |        |         |            |              |                |                 |
| country = Bangladesh                                          |        |         |            |              |                |                 |
| Haq SA2005                                                    | 441    | 5077    | 0.09       | [0.08; 0.09] | 0.1%           | 1.3%            |
| Ara R2014                                                     | 401    | 4850    | 0.08       | [0.08; 0.09] | 0.1%           | 1.3%            |
| Ahmed S2017                                                   | 135    | 1843    | 0.07       | [0.06; 0.09] | 0.0%           | 1.3%            |
| Fixed effect model                                            |        | 11770   | 0.08       | [0.08; 0.09] | 0.1%           | ---             |
| Random effects model                                          |        |         | 0.08       | [0.08; 0.09] | ---            | 3.9%            |
| Heterogeneity: $I^2 = 40%$ , $\tau^2 = < 0.0001$ , $p = 0.19$ |        |         |            |              |                |                 |
| country = Brazil                                              |        |         |            |              |                |                 |
| Senna ER2004                                                  | 47     | 3038    | 0.02       | [0.01; 0.02] | 0.0%           | 1.3%            |
| Fixed effect model                                            |        | 3038    | 0.02       | [0.01; 0.02] | 0.0%           | ---             |
| Random effects model                                          |        |         | 0.02       | [0.01; 0.02] | ---            | 1.3%            |
| Heterogeneity: not applicable                                 |        |         |            |              |                |                 |
| country = Canada                                              |        |         |            |              |                |                 |
| Cibere J2010                                                  | 98     | 255     | 0.38       | [0.32; 0.45] | 0.0%           | 1.2%            |
| Plotnikoff R2015                                              | 497    | 4733    | 0.11       | [0.10; 0.11] | 0.1%           | 1.3%            |
| Badley EM2018                                                 | 4460   | 30097   | 0.15       | [0.14; 0.15] | 0.3%           | 1.3%            |
| Fixed effect model                                            |        | 35085   | 0.14       | [0.14; 0.15] | 0.4%           | ---             |
| Random effects model                                          |        |         | 0.19       | [0.13; 0.25] | ---            | 3.8%            |
| Heterogeneity: $I^2 = 99%$ , $\tau^2 = 0.0043$ , $p < 0.01$   |        |         |            |              |                |                 |
| country = China                                               |        |         |            |              |                |                 |
| Zhang Y2001                                                   | 692    | 1781    | 0.39       | [0.37; 0.41] | 0.0%           | 1.3%            |
| Du H2005                                                      | 934    | 2093    | 0.45       | [0.42; 0.47] | 0.0%           | 1.3%            |
| Wang W2006                                                    | 176    | 1450    | 0.12       | [0.11; 0.14] | 0.0%           | 1.3%            |
| Zeng QY2006                                                   | 244    | 2188    | 0.11       | [0.10; 0.13] | 0.0%           | 1.3%            |
| Kang X2009                                                    | 155    | 1025    | 0.15       | [0.13; 0.17] | 0.0%           | 1.3%            |
| Jiang L2012                                                   | 193    | 1196    | 0.16       | [0.14; 0.18] | 0.0%           | 1.3%            |
| Zhang J2013                                                   | 983    | 7126    | 0.14       | [0.13; 0.15] | 0.1%           | 1.3%            |
| Xiang Z2013                                                   | 499    | 1499    | 0.33       | [0.31; 0.36] | 0.0%           | 1.3%            |
| Zeng SY2015                                                   | 421    | 4056    | 0.10       | [0.09; 0.11] | 0.0%           | 1.3%            |
| Tang X2016                                                    | 1387   | 17128   | 0.08       | [0.08; 0.09] | 0.2%           | 1.3%            |
| Liu Y2016                                                     | 568    | 3428    | 0.17       | [0.15; 0.18] | 0.0%           | 1.3%            |
| Fixed effect model                                            |        | 42970   | 0.14       | [0.13; 0.14] | 0.5%           | ---             |
| Random effects model                                          |        |         | 0.19       | [0.13; 0.26] | ---            | 14.2%           |
| Heterogeneity: $I^2 = 100%$ , $\tau^2 = 0.0194$ , $p = 0$     |        |         |            |              |                |                 |
| country = Denmark                                             |        |         |            |              |                |                 |
| Hvidberg MF2019                                               | 177662 | 4555439 | 0.04       | [0.04; 0.04] | 48.3%          | 1.3%            |
| Fixed effect model                                            |        | 4555439 | 0.04       | [0.04; 0.04] | 48.3%          | ---             |
| Random effects model                                          |        |         | 0.04       | [0.04; 0.04] | ---            | 1.3%            |
| Heterogeneity: not applicable                                 |        |         |            |              |                |                 |
| country = Ecuador                                             |        |         |            |              |                |                 |
| Guevara-Pacheco S2016                                         | 361    | 4877    | 0.07       | [0.07; 0.08] | 0.1%           | 1.3%            |
| Guevara SV2019                                                | 177    | 2687    | 0.07       | [0.06; 0.08] | 0.0%           | 1.3%            |
| Fixed effect model                                            |        | 7564    | 0.07       | [0.07; 0.08] | 0.1%           | ---             |
| Random effects model                                          |        |         | 0.07       | [0.06; 0.08] | ---            | 2.6%            |
| Heterogeneity: $I^2 = 42%$ , $\tau^2 = < 0.0001$ , $p = 0.19$ |        |         |            |              |                |                 |
| country = France                                              |        |         |            |              |                |                 |
| Guillemin F2011                                               | 1962   | 27109   | 0.07       | [0.07; 0.08] | 0.3%           | 1.3%            |
| Fixed effect model                                            |        | 27109   | 0.07       | [0.07; 0.08] | 0.3%           | ---             |
| Random effects model                                          |        |         | 0.07       | [0.07; 0.08] | ---            | 1.3%            |
| Heterogeneity: not applicable                                 |        |         |            |              |                |                 |
| country = Germany                                             |        |         |            |              |                |                 |
| Edwards M2014                                                 | 45     | 405     | 0.11       | [0.08; 0.15] | 0.0%           | 1.2%            |
| Postler A2018                                                 | 329216 | 2700000 | 0.12       | [0.12; 0.12] | 28.6%          | 1.3%            |
| Fixed effect model                                            |        | 2700405 | 0.12       | [0.12; 0.12] | 28.6%          | ---             |
| Random effects model                                          |        |         | 0.12       | [0.12; 0.12] | ---            | 2.5%            |
| Heterogeneity: $I^2 = 0%$ , $\tau^2 = 0$ , $p = 0.54$         |        |         |            |              |                |                 |
| country = Hungary                                             |        |         |            |              |                |                 |
| Horv??th G2011                                                | 111    | 672     | 0.17       | [0.14; 0.20] | 0.0%           | 1.3%            |
| Fixed effect model                                            |        | 672     | 0.17       | [0.14; 0.19] | 0.0%           | ---             |
| Random effects model                                          |        |         | 0.17       | [0.14; 0.19] | ---            | 1.3%            |
| Heterogeneity: not applicable                                 |        |         |            |              |                |                 |
| country = India                                               |        |         |            |              |                |                 |
| Joshi VL2009                                                  | 451    | 8145    | 0.06       | [0.05; 0.06] | 0.1%           | 1.3%            |
| Salve H2010                                                   | 123    | 260     | 0.47       | [0.41; 0.54] | 0.0%           | 1.2%            |
| Fixed effect model                                            |        | 8405    | 0.06       | [0.06; 0.07] | 0.1%           | ---             |
| Random effects model                                          |        |         | -0.23      | [0.00; 0.72] | ---            | 2.5%            |
| Heterogeneity: $I^2 = 100%$ , $\tau^2 = 0.1352$ , $p < 0.01$  |        |         |            |              |                |                 |
| country = India                                               |        |         |            |              |                |                 |
| Ajit NE2012                                                   | 58     | 342     | 0.17       | [0.13; 0.21] | 0.0%           | 1.2%            |
| Singh AK2014                                                  | 204    | 496     | 0.41       | [0.37; 0.46] | 0.0%           | 1.2%            |
| Pal CP2016                                                    | 1412   | 4909    | 0.29       | [0.27; 0.30] | 0.1%           | 1.3%            |
| Venkatachalam J2018                                           | 538    | 1986    | 0.27       | [0.25; 0.29] | 0.0%           | 1.3%            |
| Kumar P2018                                                   | 766    | 10171   | 0.08       | [0.07; 0.08] | 0.1%           | 1.3%            |
| Gavali M2018                                                  | 84     | 647     | 0.13       | [0.10; 0.16] | 0.0%           | 1.3%            |
| Fixed effect model                                            |        | 18551   | 0.15       | [0.15; 0.16] | 0.2%           | ---             |
| Random effects model                                          |        |         | 0.21       | [0.11; 0.34] | ---            | 7.6%            |
| Heterogeneity: $I^2 = 100%$ , $\tau^2 = 0.0327$ , $p < 0.01$  |        |         |            |              |                |                 |
| country = Indonesia                                           |        |         |            |              |                |                 |
| Ananto M2018                                                  | 296    | 2067    | 0.14       | [0.13; 0.16] | 0.0%           | 1.3%            |
| Fixed effect model                                            |        | 2067    | 0.14       | [0.13; 0.16] | 0.0%           | ---             |
| Random effects model                                          |        |         | 0.14       | [0.13; 0.16] | ---            | 1.3%            |
| Heterogeneity: not applicable                                 |        |         |            |              |                |                 |
| country = Iran                                                |        |         |            |              |                |                 |
| Davatchi F2008                                                | 1532   | 10291   | 0.15       | [0.14; 0.16] | 0.1%           | 1.3%            |
| Sandoughi M2013                                               | 321    | 2100    | 0.15       | [0.14; 0.17] | 0.0%           | 1.3%            |
| Tehrani-Banihashemi A2014                                     | 303    | 1565    | 0.19       | [0.17; 0.21] | 0.0%           | 1.3%            |
| Moghimi N2015                                                 | 1096   | 5830    | 0.19       | [0.18; 0.20] | 0.1%           | 1.3%            |
| Kolahi S2017                                                  | 143    | 952     | 0.15       | [0.13; 0.17] | 0.0%           | 1.3%            |
| Fixed effect model                                            |        | 20738   | 0.16       | [0.16; 0.17] | 0.2%           | ---             |
| Random effects model                                          |        |         | 0.17       | [0.15; 0.19] | ---            | 6.5%            |
| Heterogeneity: $I^2 = 93%$ , $\tau^2 = 0.0009$ , $p < 0.01$   |        |         |            |              |                |                 |
| country = Italy                                               |        |         |            |              |                |                 |
| Salaffi F2005                                                 | 116    | 2155    | 0.05       | [0.04; 0.06] | 0.0%           | 1.3%            |
| Edwards M2014                                                 | 135    | 467     | 0.29       | [0.25; 0.33] | 0.0%           | 1.2%            |
| Fixed effect model                                            |        | 2622    | 0.08       | [0.07; 0.09] | 0.0%           | ---             |
| Random effects model                                          |        |         | 0.15       | [0.00; 0.44] | ---            | 2.5%            |
| Heterogeneity: $I^2 = 99%$ , $\tau^2 = 0.0553$ , $p < 0.01$   |        |         |            |              |                |                 |
| country = Japan                                               |        |         |            |              |                |                 |
| Yoshimura N2009                                               | 1660   | 3040    | 0.55       | [0.53; 0.56] | 0.0%           | 1.3%            |
| Sasaki E2020                                                  | 282    | 1104    | 0.26       | [0.23; 0.28] | 0.0%           | 1.3%            |
| Fixed effect model                                            |        | 4144    | 0.47       | [0.45; 0.48] | 0.0%           | ---             |
| Random effects model                                          |        |         | 0.40       | [0.14; 0.69] | ---            | 2.6%            |
| Heterogeneity: $I^2 = 100%$ , $\tau^2 = 0.0453$ , $p < 0.01$  |        |         |            |              |                |                 |
| country = Lebanon                                             |        |         |            |              |                |                 |
| Chaaya M2012                                                  | 106    | 3530    | 0.03       | [0.02; 0.04] | 0.0%           | 1.3%            |
| Fixed effect model                                            |        | 3530    | 0.03       | [0.02; 0.04] | 0.0%           | ---             |
| Random effects model                                          |        |         | 0.03       | [0.02; 0.04] | ---            | 1.3%            |
| Heterogeneity: not applicable                                 |        |         |            |              |                |                 |
| country = Mexico                                              |        |         |            |              |                |                 |
| Mac??as-Hern??ndez SI2018                                     | 52     | 204     | 0.25       | [0.20; 0.32] | 0.0%           | 1.2%            |
| Fixed effect model                                            |        | 204     | 0.25       | [0.20; 0.32] | 0.0%           | ---             |
| Random effects model                                          |        |         | 0.25       | [0.20; 0.32] | ---            | 1.2%            |
| Heterogeneity: not applicable                                 |        |         |            |              |                |                 |
| country = Netherlands                                         |        |         |            |              |                |                 |
| Visser AW2014                                                 | 991    | 5284    | 0.19       | [0.18; 0.20] | 0.1%           | 1.3%            |
| Edwards M2014                                                 | 102    | 558     | 0.18       | [0.15; 0.22] | 0.0%           | 1.3%            |
| Fixed effect model                                            |        | 5842    | 0.19       | [0.18; 0.20] | 0.1%           | ---             |
| Random effects model                                          |        |         | 0.19       | [0.18; 0.20] | ---            | 2.6%            |
| Heterogeneity: $I^2 = 0%$ , $\tau^2 = 0$ , $p = 0.81$         |        |         |            |              |                |                 |
| country = Norway                                              |        |         |            |              |                |                 |
| Grotle M2008                                                  | 232    | 3266    | 0.07       | [0.06; 0.08] | 0.0%           | 1.3%            |
| Fixed effect model                                            |        | 3266    | 0.07       | [0.06; 0.08] | 0.0%           | ---             |
| Random effects model                                          |        |         | 0.07       | [0.06; 0.08] | ---            | 1.3%            |
| Heterogeneity: not applicable                                 |        |         |            |              |                |                 |
| country = Peru                                                |        |         |            |              |                |                 |
| Vega-Hinojosa O2018                                           | 17     | 1095    | 0.02       | [0.01; 0.02] | 0.0%           | 1.3%            |
| Fixed effect model                                            |        | 1095    | 0.02       | [0.01; 0.02] | 0.0%           | ---             |
| Random effects model                                          |        |         | 0.02       | [0.01; 0.02] | ---            | 1.3%            |
| Heterogeneity: not applicable                                 |        |         |            |              |                |                 |
| country = Portugal                                            |        |         |            |              |                |                 |
| Branco JC2016                                                 | 981    | 7911    | 0.12       | [0.12; 0.13] | 0.1%           | 1.3%            |
| Fixed effect model                                            |        | 7911    | 0.12       | [0.12; 0.13] | 0.1%           | ---             |
| Random effects model                                          |        |         | 0.12       | [0.12; 0.13] | ---            | 1.3%            |
| Heterogeneity: not applicable                                 |        |         |            |              |                |                 |
| country = Singapore                                           |        |         |            |              |                |                 |
| Leung YY2018                                                  | 370    | 3364    | 0.11       | [0.10; 0.12] | 0.0%           | 1.3%            |
| Fixed effect model                                            |        | 3364    | 0.11       | [0.10; 0.12] | 0.0%           | ---             |
| Random effects model                                          |        |         | 0.11       | [0.10; 0.12] | ---            | 1.3%            |
| Heterogeneity: not applicable                                 |        |         |            |              |                |                 |
| country = South Korea                                         |        |         |            |              |                |                 |
| Kim I2010                                                     | 188    | 504     | 0.37       | [0.33; 0.42] | 0.0%           | 1.2%            |
| Cho HJ2015                                                    | 265    | 696     | 0.38       | [0.34; 0.42] | 0.0%           | 1.3%            |
| Hong JW2020                                                   | 4313   | 12287   | 0.35       | [0.34; 0.36] | 0.1%           | 1.3%            |
| Fixed effect model                                            |        | 13487   | 0.35       | [0.35; 0.36] | 0.1%           | ---             |
| Random effects model                                          |        |         | 0.36       | [0.34; 0.38] | ---            | 3.8%            |
| Heterogeneity: $I^2 = 42%$ , $\tau^2 = 0.0002$ , $p = 0.18$   |        |         |            |              |                |                 |
| country = Spain                                               |        |         |            |              |                |                 |
| Quintana JM2008                                               | 925    | 7577    | 0.12       | [0.11; 0.13] | 0.1%           | 1.3%            |
| Edwards M2014                                                 | 129    | 535     | 0.24       | [0.21; 0.28] | 0.0%           | 1.3%            |
| Seoane-Mato D2018                                             | 661    | 4753    | 0.14       | [0.13; 0.15] | 0.1%           | 1.3%            |
| Rodríguez-Veiga D2019                                         | 207    | 707     | 0.29       | [0.26; 0.33] | 0.0%           | 1.3%            |
| Fixed effect model                                            |        | 13572   | 0.14       | [0.13; 0.15] | 0.1%           | ---             |
| Random effects model                                          |        |         | 0.19       | [0.14; 0.25] | ---            | 5.1%            |
| Heterogeneity: $I^2 = 98%$ , $\tau^2 = 0.0051$ , $p < 0.01$   |        |         |            |              |                |                 |
| country = Sri Lanka                                           |        |         |            |              |                |                 |
| Namali H2011                                                  | 207    | 1750    | 0.12       | [0.10; 0.13] | 0.0%           | 1.3%            |
| Prashansanie Hettihewa A2018                                  | 134    | 666     | 0.20       | [0.17; 0.23] | 0.0%           | 1.3%            |
| Fixed effect model                                            |        | 2416    | 0.14       | [0.13; 0.15] | 0.0%           | ---             |
| Random effects model                                          |        |         | 0.16       | [0.08; 0.25] | ---            | 2.6%            |
| Heterogeneity: $I^2 = 96%$ , $\tau^2 = 0.0063$ , $p < 0.01$   |        |         |            |              |                |                 |
| country = Sweden                                              |        |         |            |              |                |                 |
| Turkiewicz A2013                                              | 1965   | 7737    | 0.25       | [0.24; 0.26] | 0.1%           | 1.3%            |
| Edwards M2014                                                 | 101    | 506     | 0.20       | [0.17; 0.24] | 0.0%           | 1.2%            |
| Fixed effect model                                            |        | 8243    | 0.25       | [0.24; 0.26] | 0.1%           | ---             |
| Random effects model                                          |        |         | 0.23       | [0.18; 0.28] | ---            | 2.6%            |
| Heterogeneity: $I^2 = 87%$ , $\tau^2 = 0.0018$ , $p < 0.01$   |        |         |            |              |                |                 |
| country = Thailand                                            |        |         |            |              |                |                 |
| Tangtrakulwanich B2007                                        | 234    | 506     | 0.46       | [0.42; 0.51] | 0.0%           | 1.2%            |
| Fixed effect model                                            |        | 506     | 0.46       | [0.42; 0.51] | 0.0%           | ---             |
| Random effects model                                          |        |         | 0.46       | [0.42; 0.51] | ---            | 1.2%            |
| Heterogeneity: not applicable                                 |        |         |            |              |                |                 |
| country = Turkey                                              |        |         |            |              |                |                 |
| Ka?ar C2005                                                   | 97     | 655     | 0.15       | [0.12; 0.18] | 0.0%           | 1.3%            |
| Cak?r N2012                                                   | 265    | 4952    | 0.05       | [0.05; 0.06] | 0.1%           | 1.3%            |
| Ye?il H2013                                                   | 109    | 522     | 0.21       | [0.17; 0.25] | 0.0%           | 1.3%            |
| Fixed effect model                                            |        | 6129    | 0.07       | [0.07; 0.08] | 0.1%           | ---             |
| Random effects model                                          |        |         | 0.13       | [0.04; 0.25] | ---            | 3.8%            |
| Heterogeneity: $I^2 = 99%$ , $\tau^2 = 0.0191$ , $p < 0.01$   |        |         |            |              |                |                 |
| country = UK                                                  |        |         |            |              |                |                 |
| Thomas E2014                                                  | 8000   | 26100   | 0.31       | [0.30; 0.31] | 0.3%           | 1.3%            |
| Edwards M2014                                                 | 69     | 433     | 0.16       | [0.13; 0.20] | 0.0%           | 1.2%            |
| Swain S2020                                                   | 49028  | 1690618 | 0.03       | [0.03; 0.03] | 17.9%          | 1.3%            |
| Fixed effect model                                            |        | 1717151 | 0.03       | [0.03; 0.03] | 18.2%          | ---             |
| Random effects model                                          |        |         | 0.14       | [0.00; 0.44] | ---            | 3.9%            |
| Heterogeneity: $I^2 = 100%$ , $\tau^2 = 0.0854$ , $p = 0$     |        |         |            |              |                |                 |
| country = United Arab Emirates.                               |        |         |            |              |                |                 |
| Al Saleh J2016                                                | 1028   | 3984    | 0.26       | [0.24; 0.27] | 0.0%           |                 |
