# Supplementary material for: Global, regional prevalence, incidence and risk factors of knee osteoarthritis in population-based studies
Source: PubMed Central journal article supplement — eClinicalMedicine. 2020 Nov 26;29-30:100587. doi: 10.1016/j.eclinm.2020.100587 (PMC7704420; doi:10.1016/j.eclinm.2020.100587), 2020-11-26

| Study                                                        | Junior and Senior high school |       | College and above |       |
|--------------------------------------------------------------|-------------------------------|-------|-------------------|-------|
|                                                              | Events                        | Total | Events            | Total |
| Zeng QY2006                                                  | 201                           | 1779  | 15                | 262   |
| Xiang Z2013                                                  | 328                           | 1070  | 67                | 192   |
| Zhang J2013                                                  | 390                           | 4388  | 11                | 495   |
| Tang X2016                                                   | 270                           | 5307  | 3                 | 420   |
| Venkatachalam J2018                                          | 88                            | 722   | 6                 | 109   |
| Hong JW2020                                                  | 1242                          | 4820  | 232               | 1374  |
| <b>Fixed effect model</b>                                    | <b>18086</b>                  |       | <b>2852</b>       |       |
| <b>Random effects model</b>                                  |                               |       |                   |       |
| Heterogeneity: $I^2 = 89\%$ , $\tau^2 = 0.2346$ , $p < 0.01$ |                               |       |                   |       |

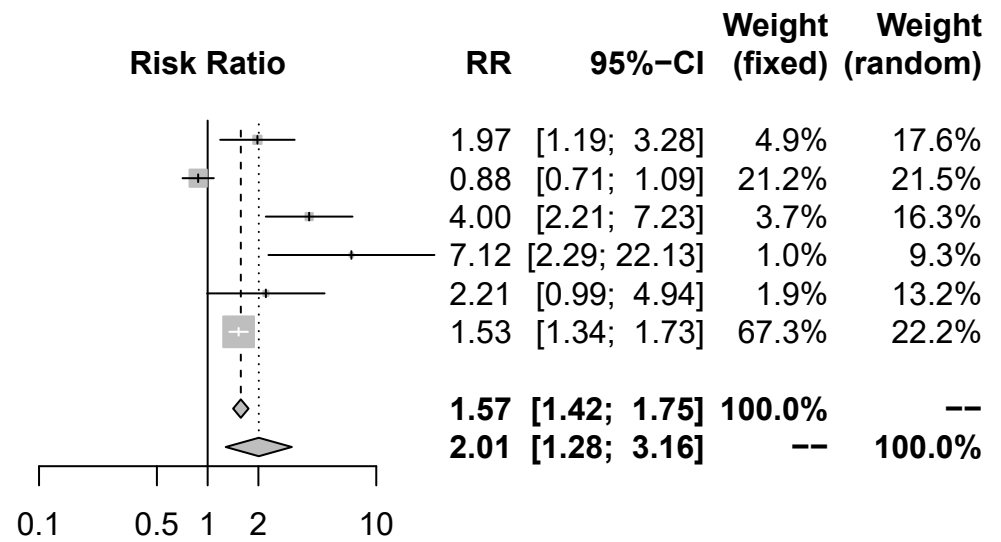

Supplement: mmc20.pdf [file mmc20.pdf]
