# Supplementary figures and images for: Global, regional prevalence, incidence and risk factors of knee osteoarthritis in population-based studies
Source: PubMed Central journal article supplement — eClinicalMedicine. 2020 Nov 26;29-30:100587. doi: 10.1016/j.eclinm.2020.100587 (PMC7704420; doi:10.1016/j.eclinm.2020.100587), 2020-11-26

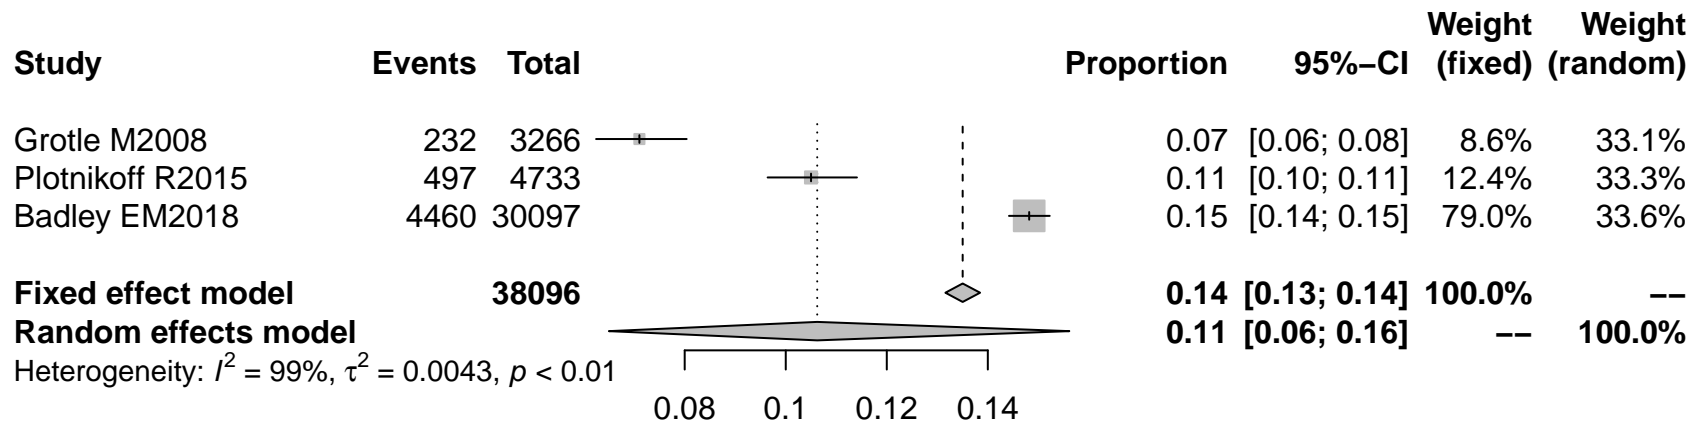

Supplement: mmc10.pdf [file mmc10.pdf]

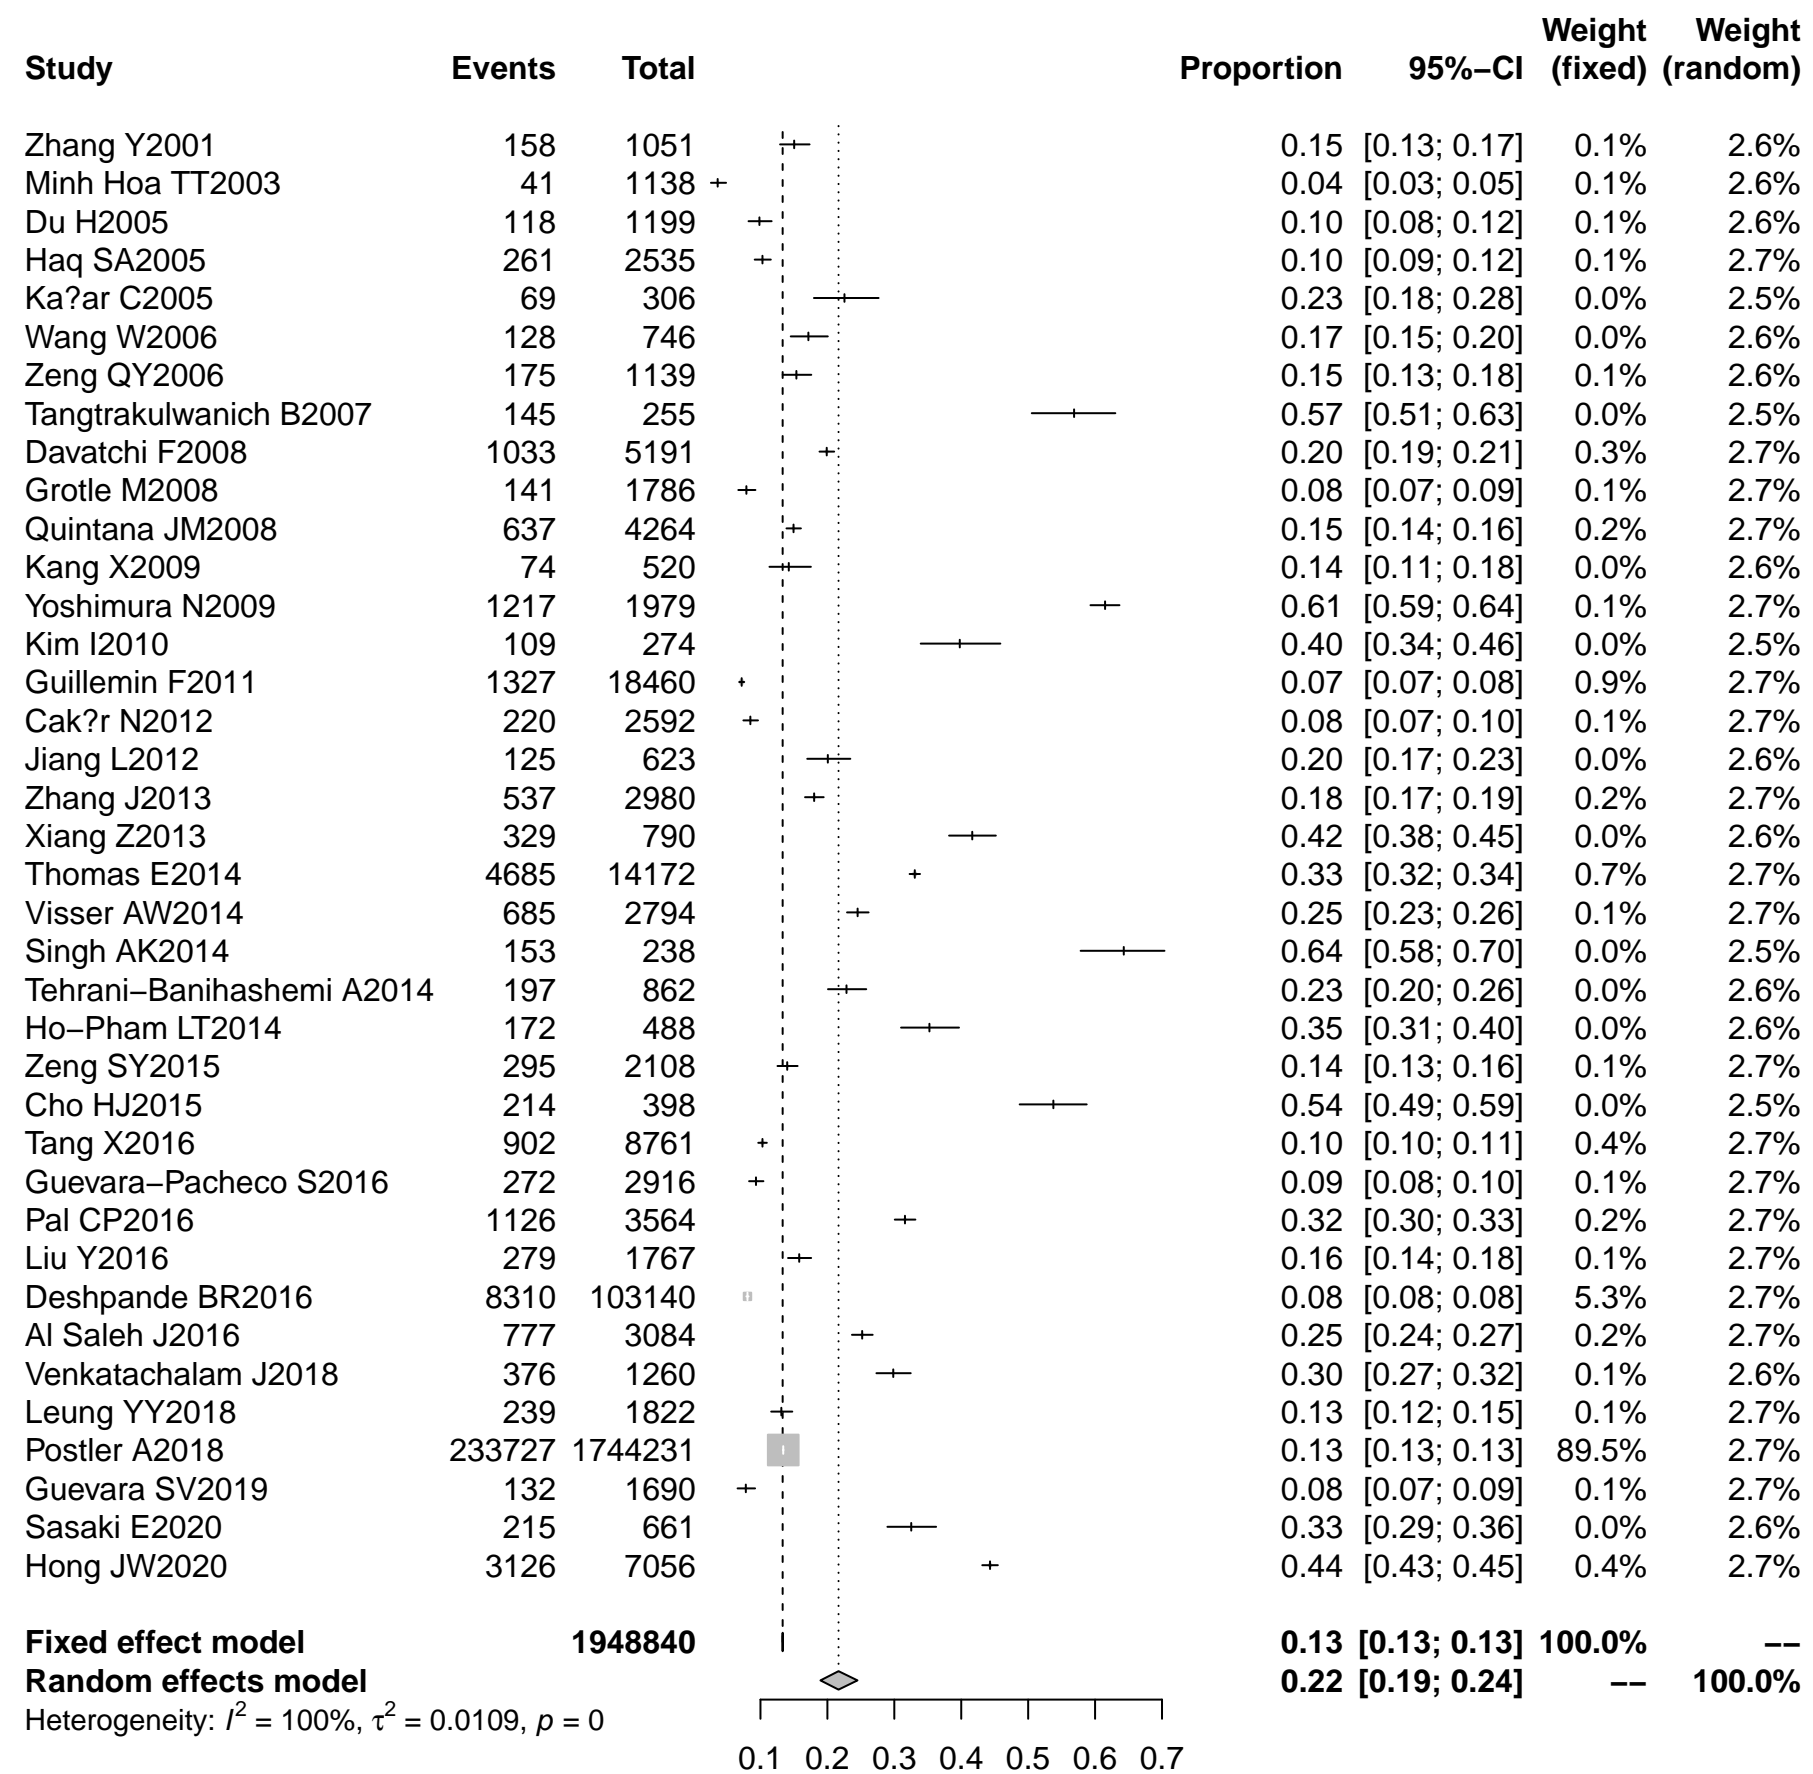

Supplement: mmc11.pdf [file mmc11.pdf]

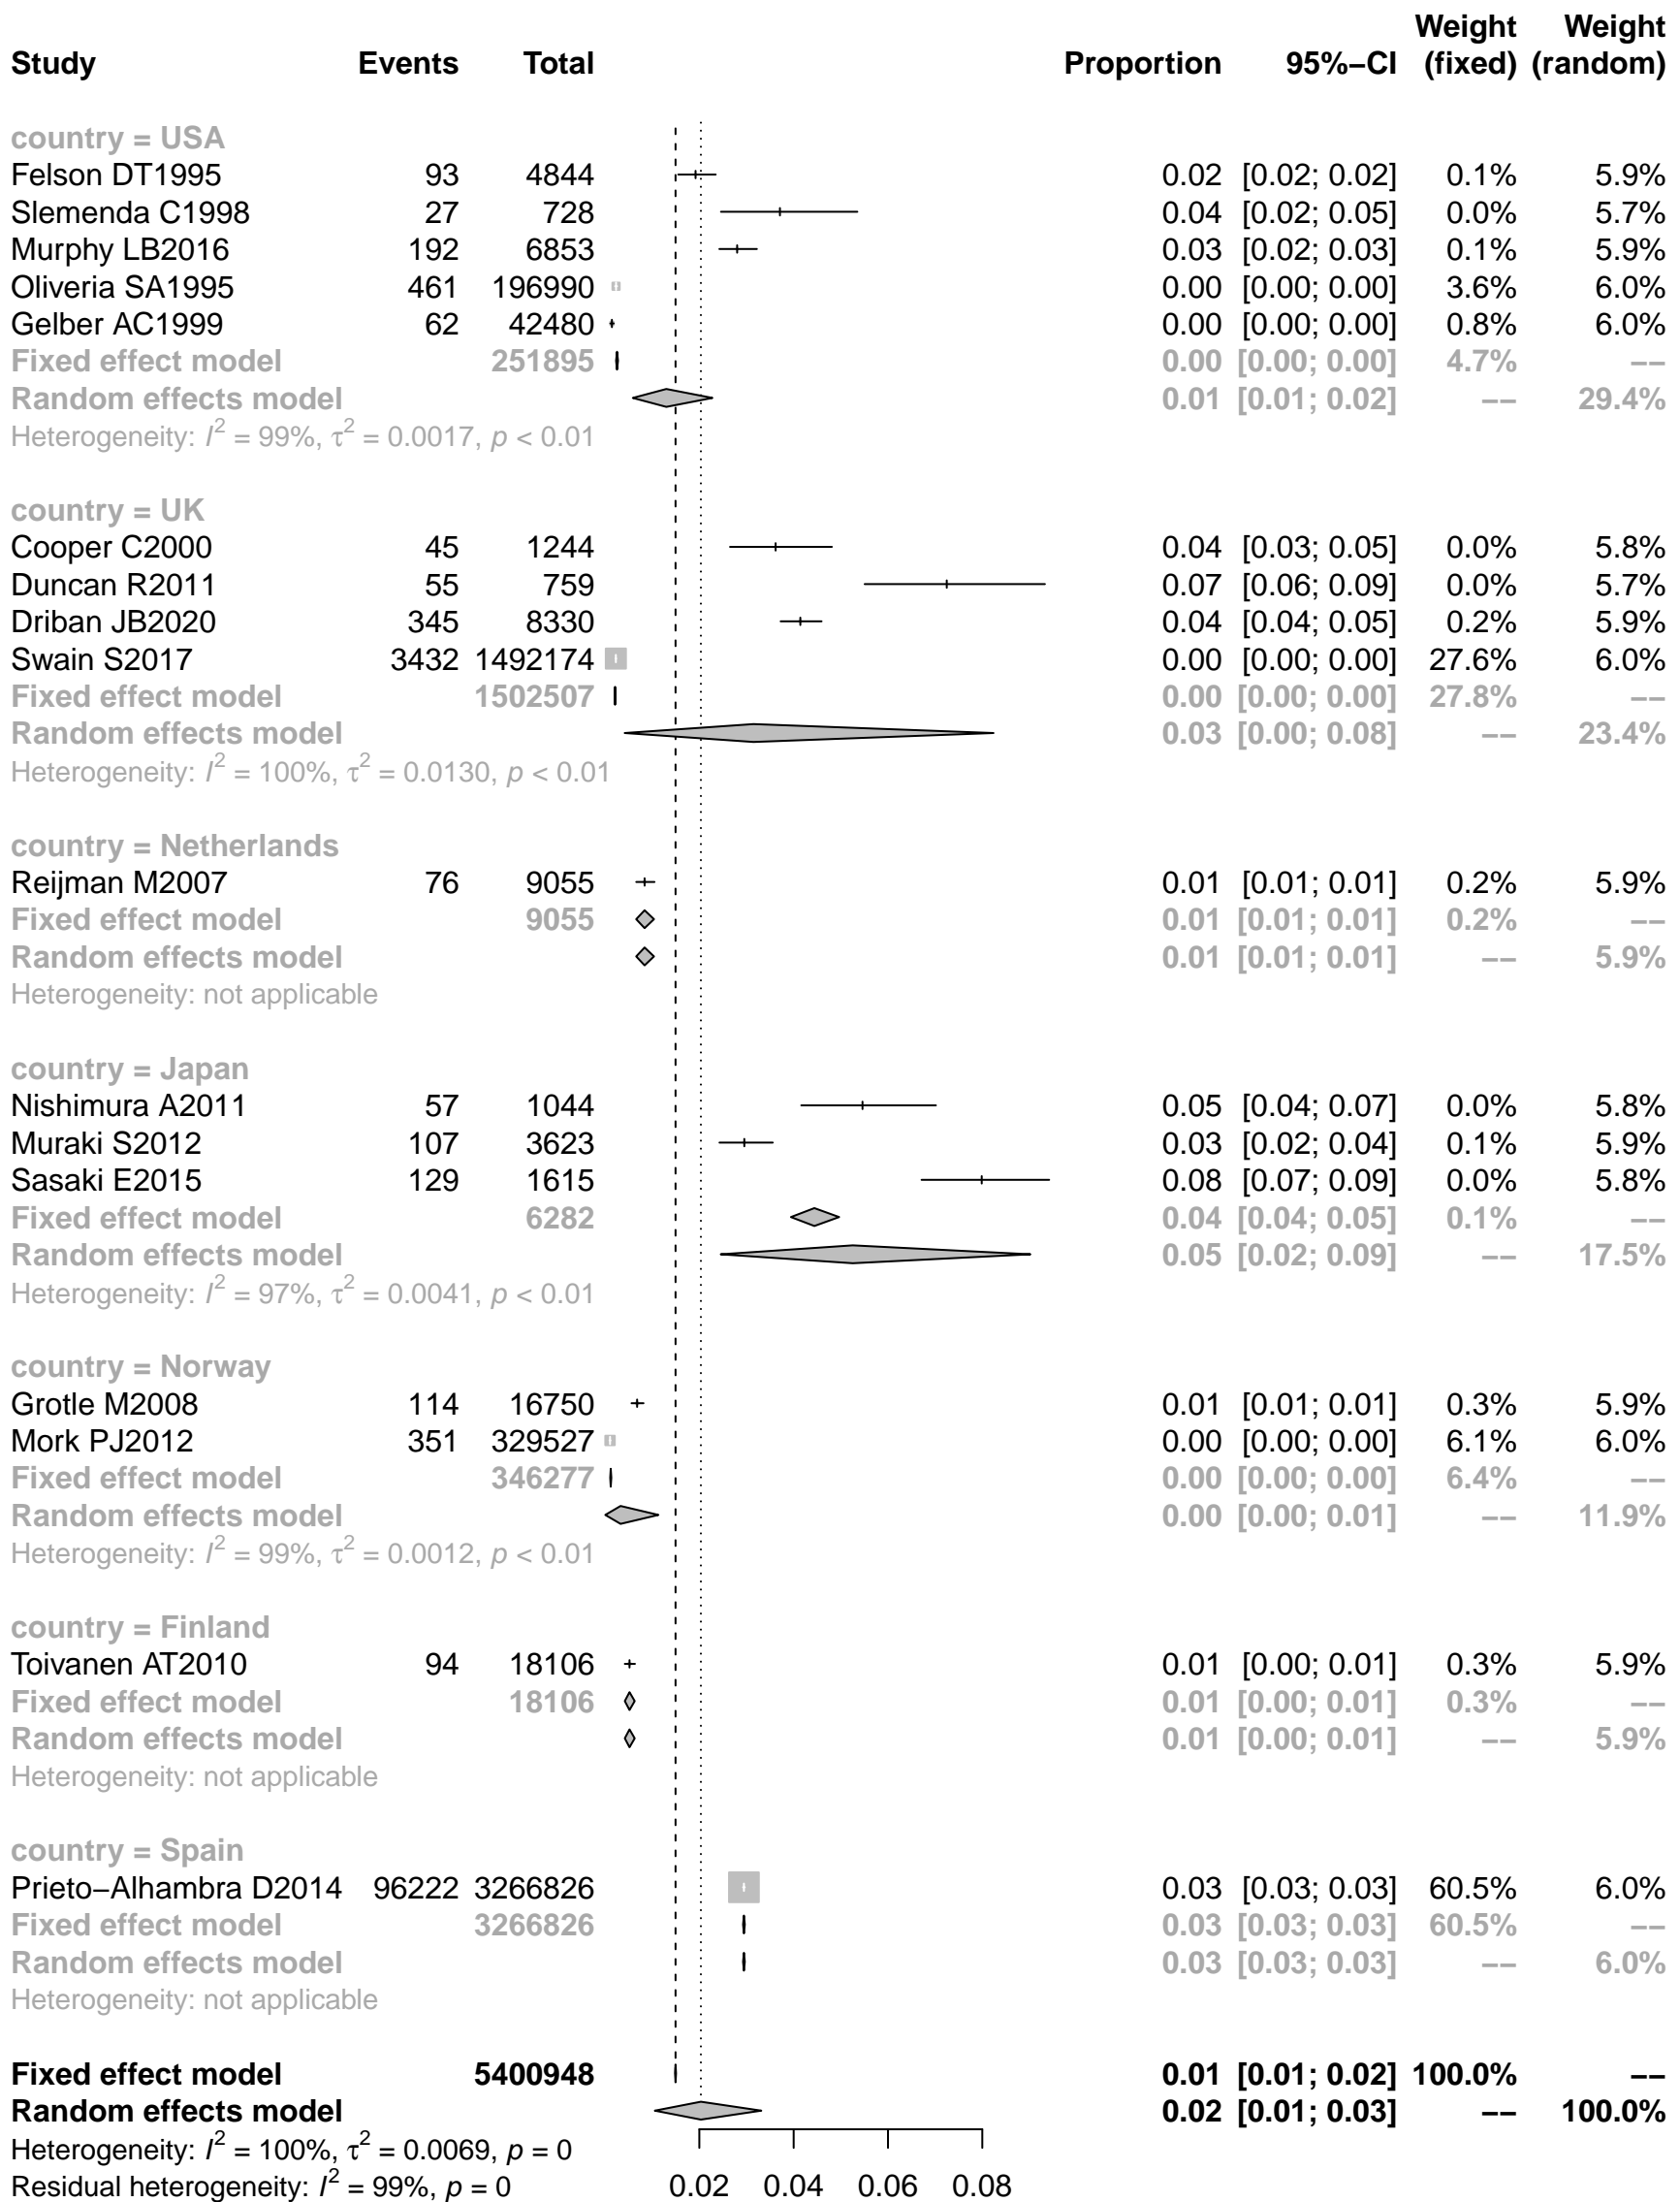

Supplement: mmc13.pdf [file mmc13.pdf]

*Incidence of knee osteoarthritis changes with age*

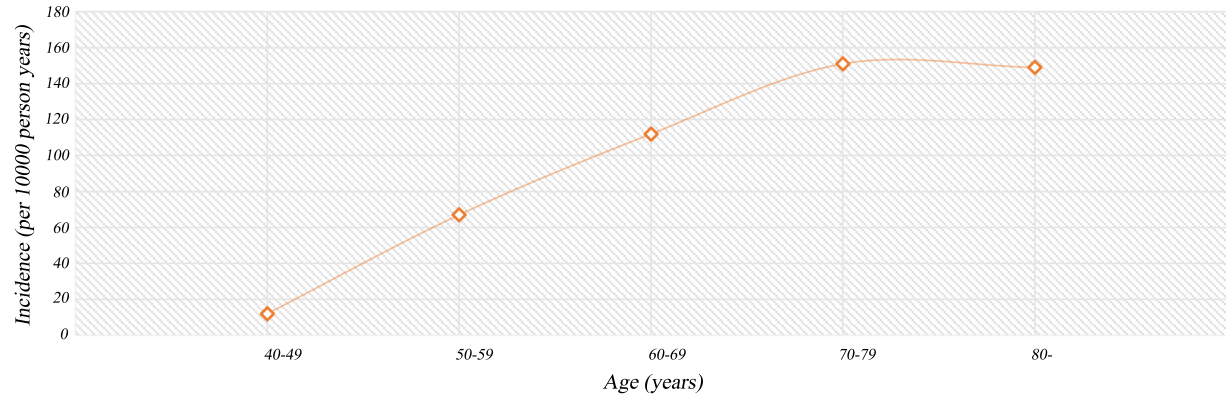

Supplement: mmc16.pdf [file mmc16.pdf]

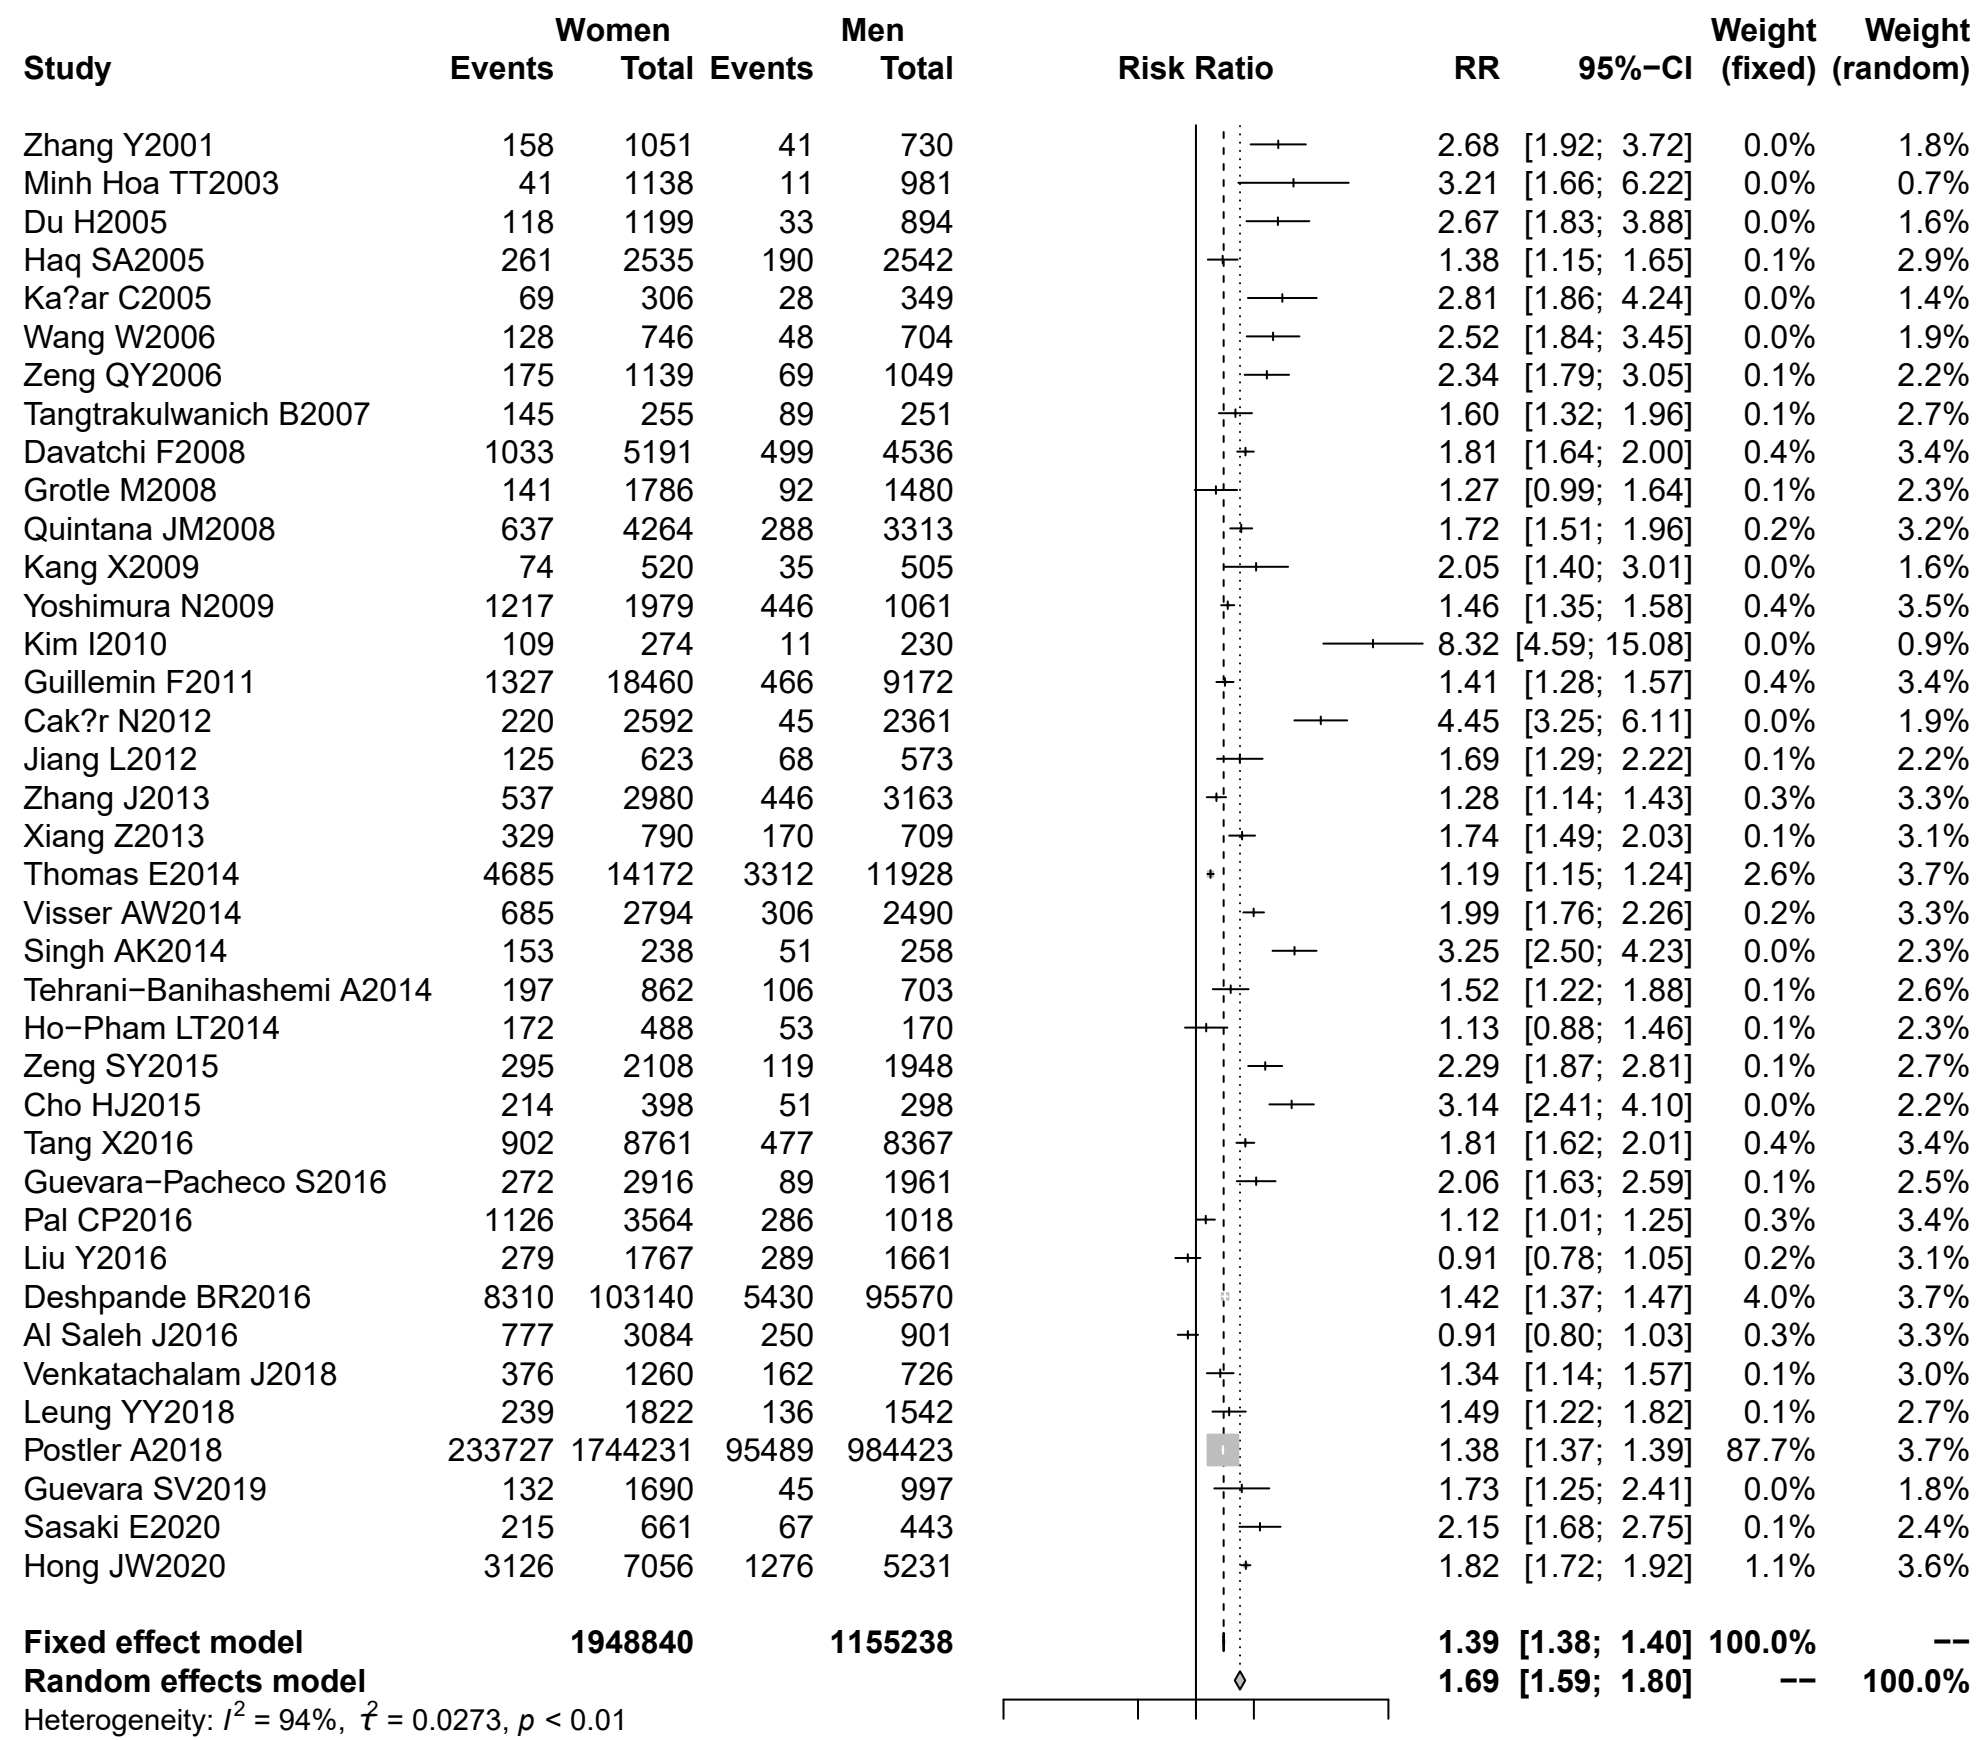

Supplement: mmc17.pdf [file mmc17.pdf]

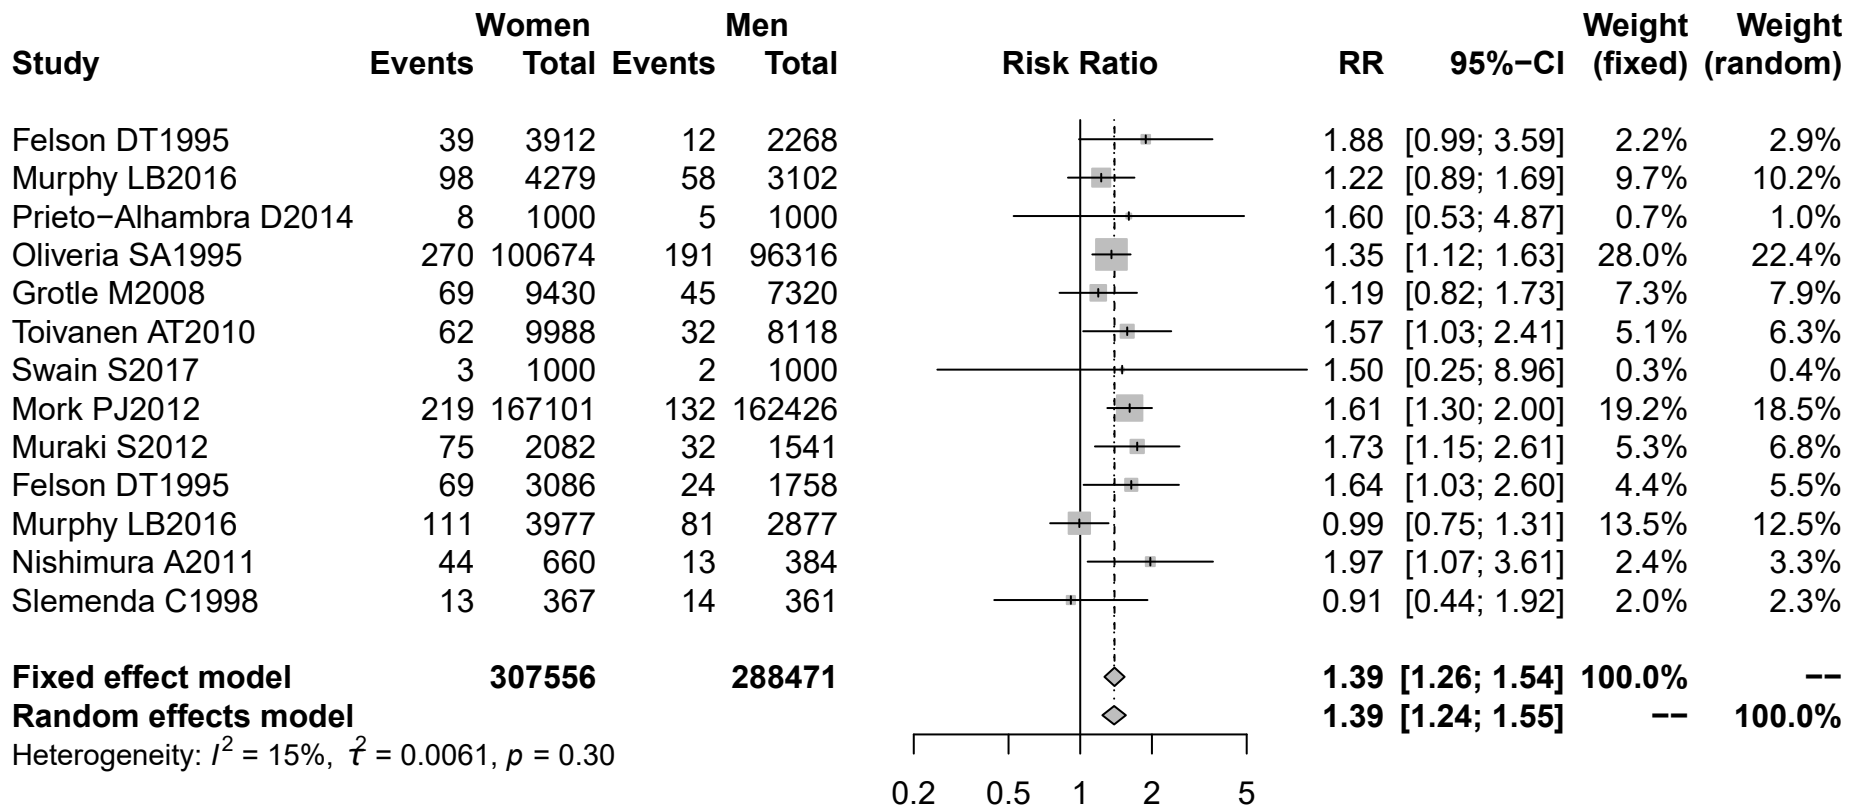

Supplement: mmc18.pdf [file mmc18.pdf]

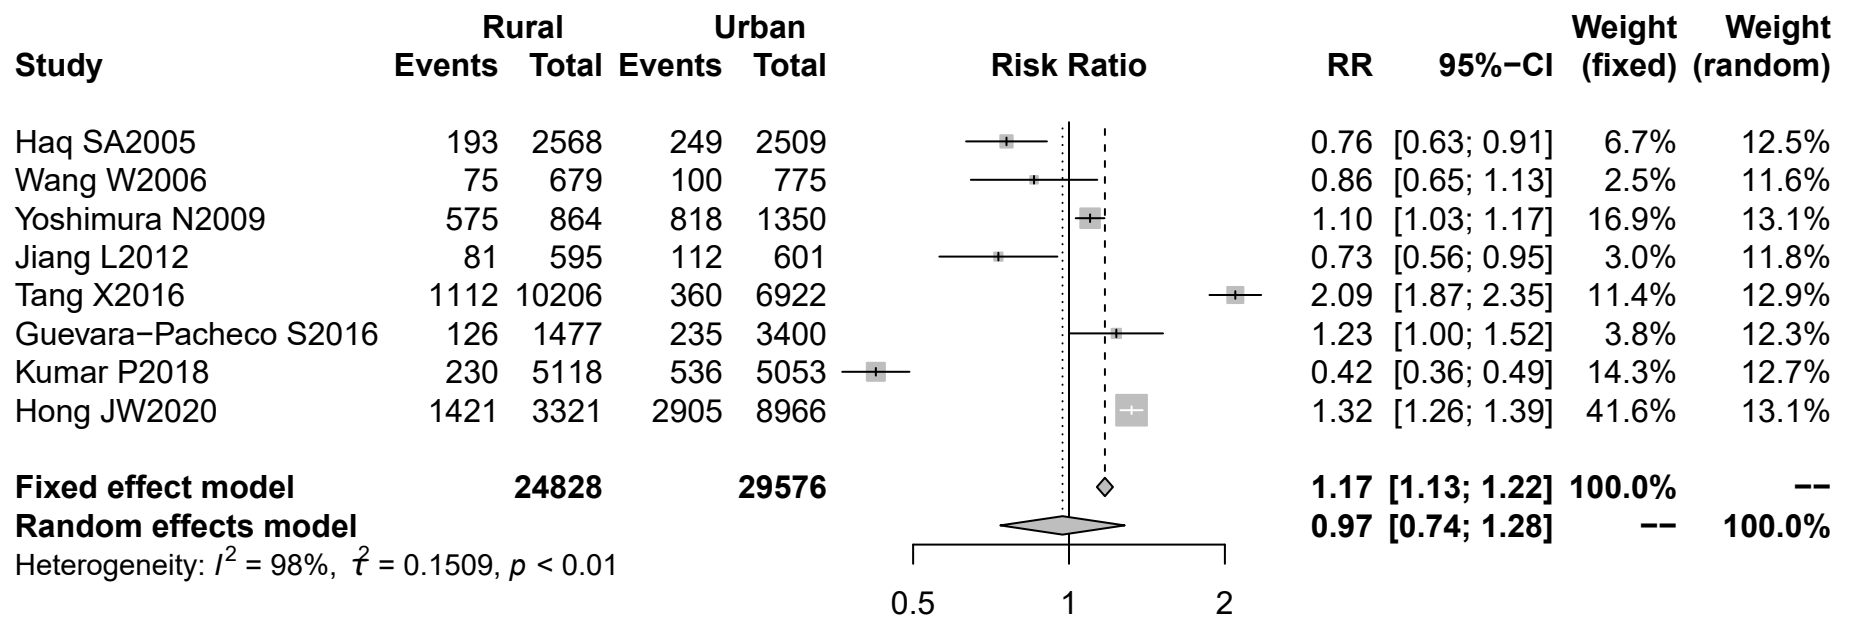

Supplement: mmc19.pdf [file mmc19.pdf]

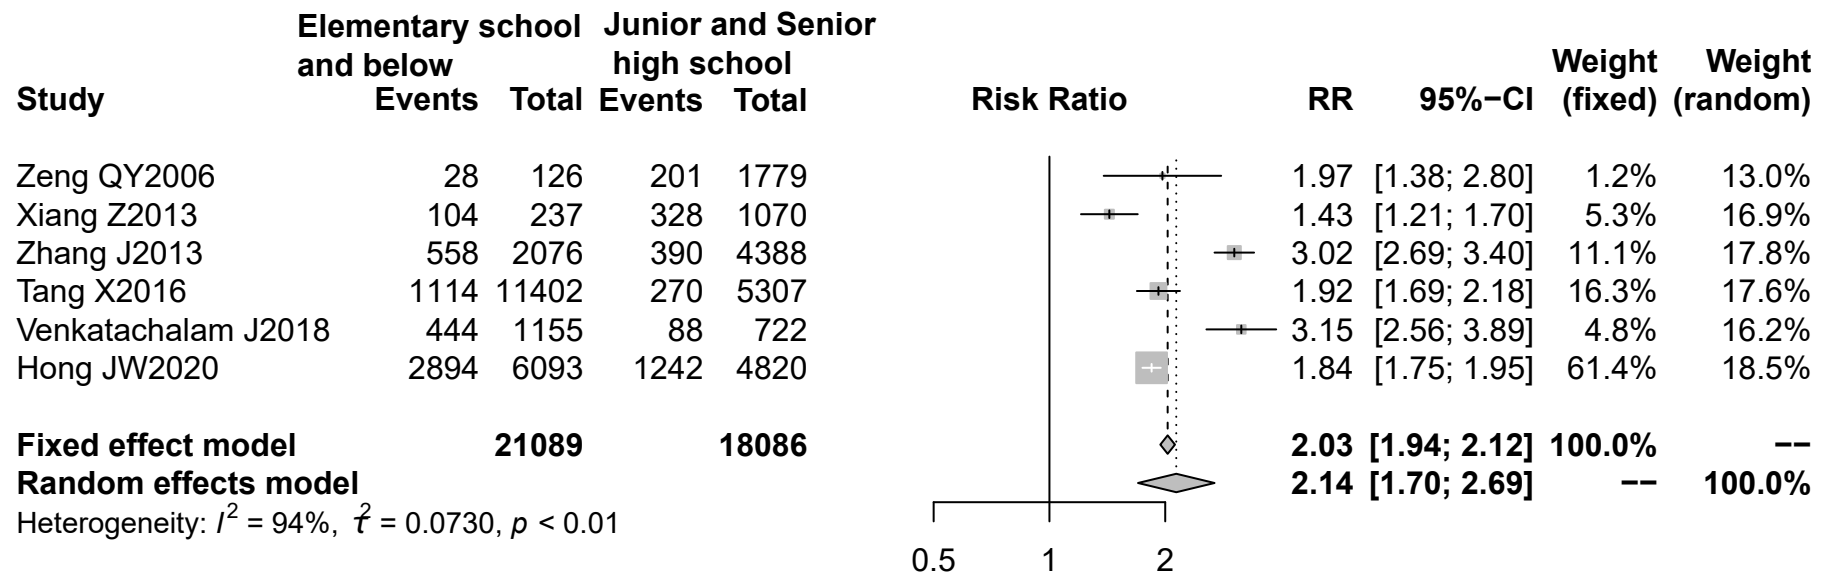

Supplement: mmc21.pdf [file mmc21.pdf]

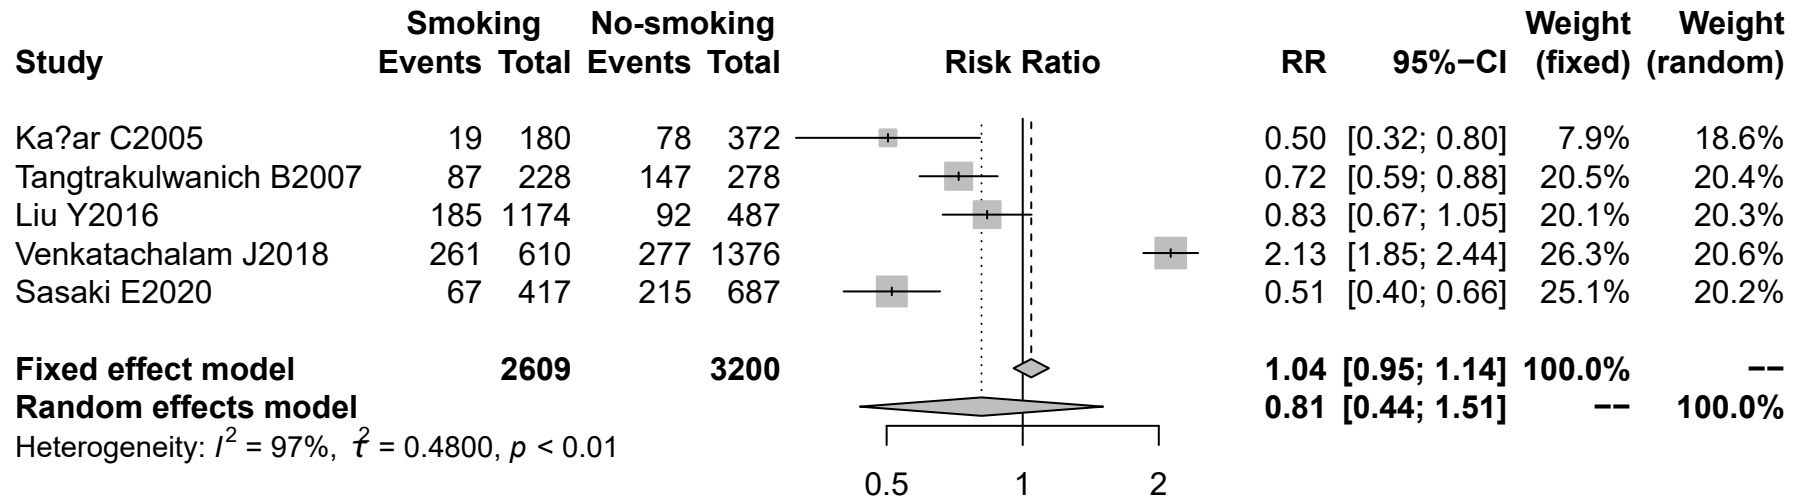

Supplement: mmc22.pdf [file mmc22.pdf]

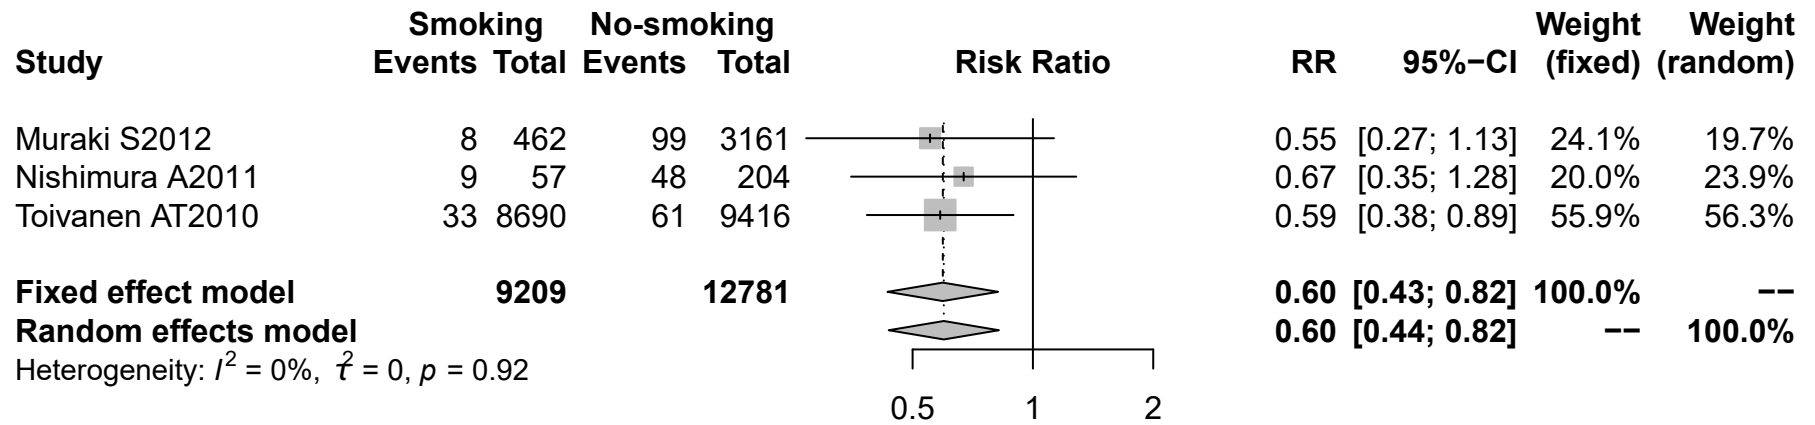

Supplement: mmc23.pdf [file mmc23.pdf]

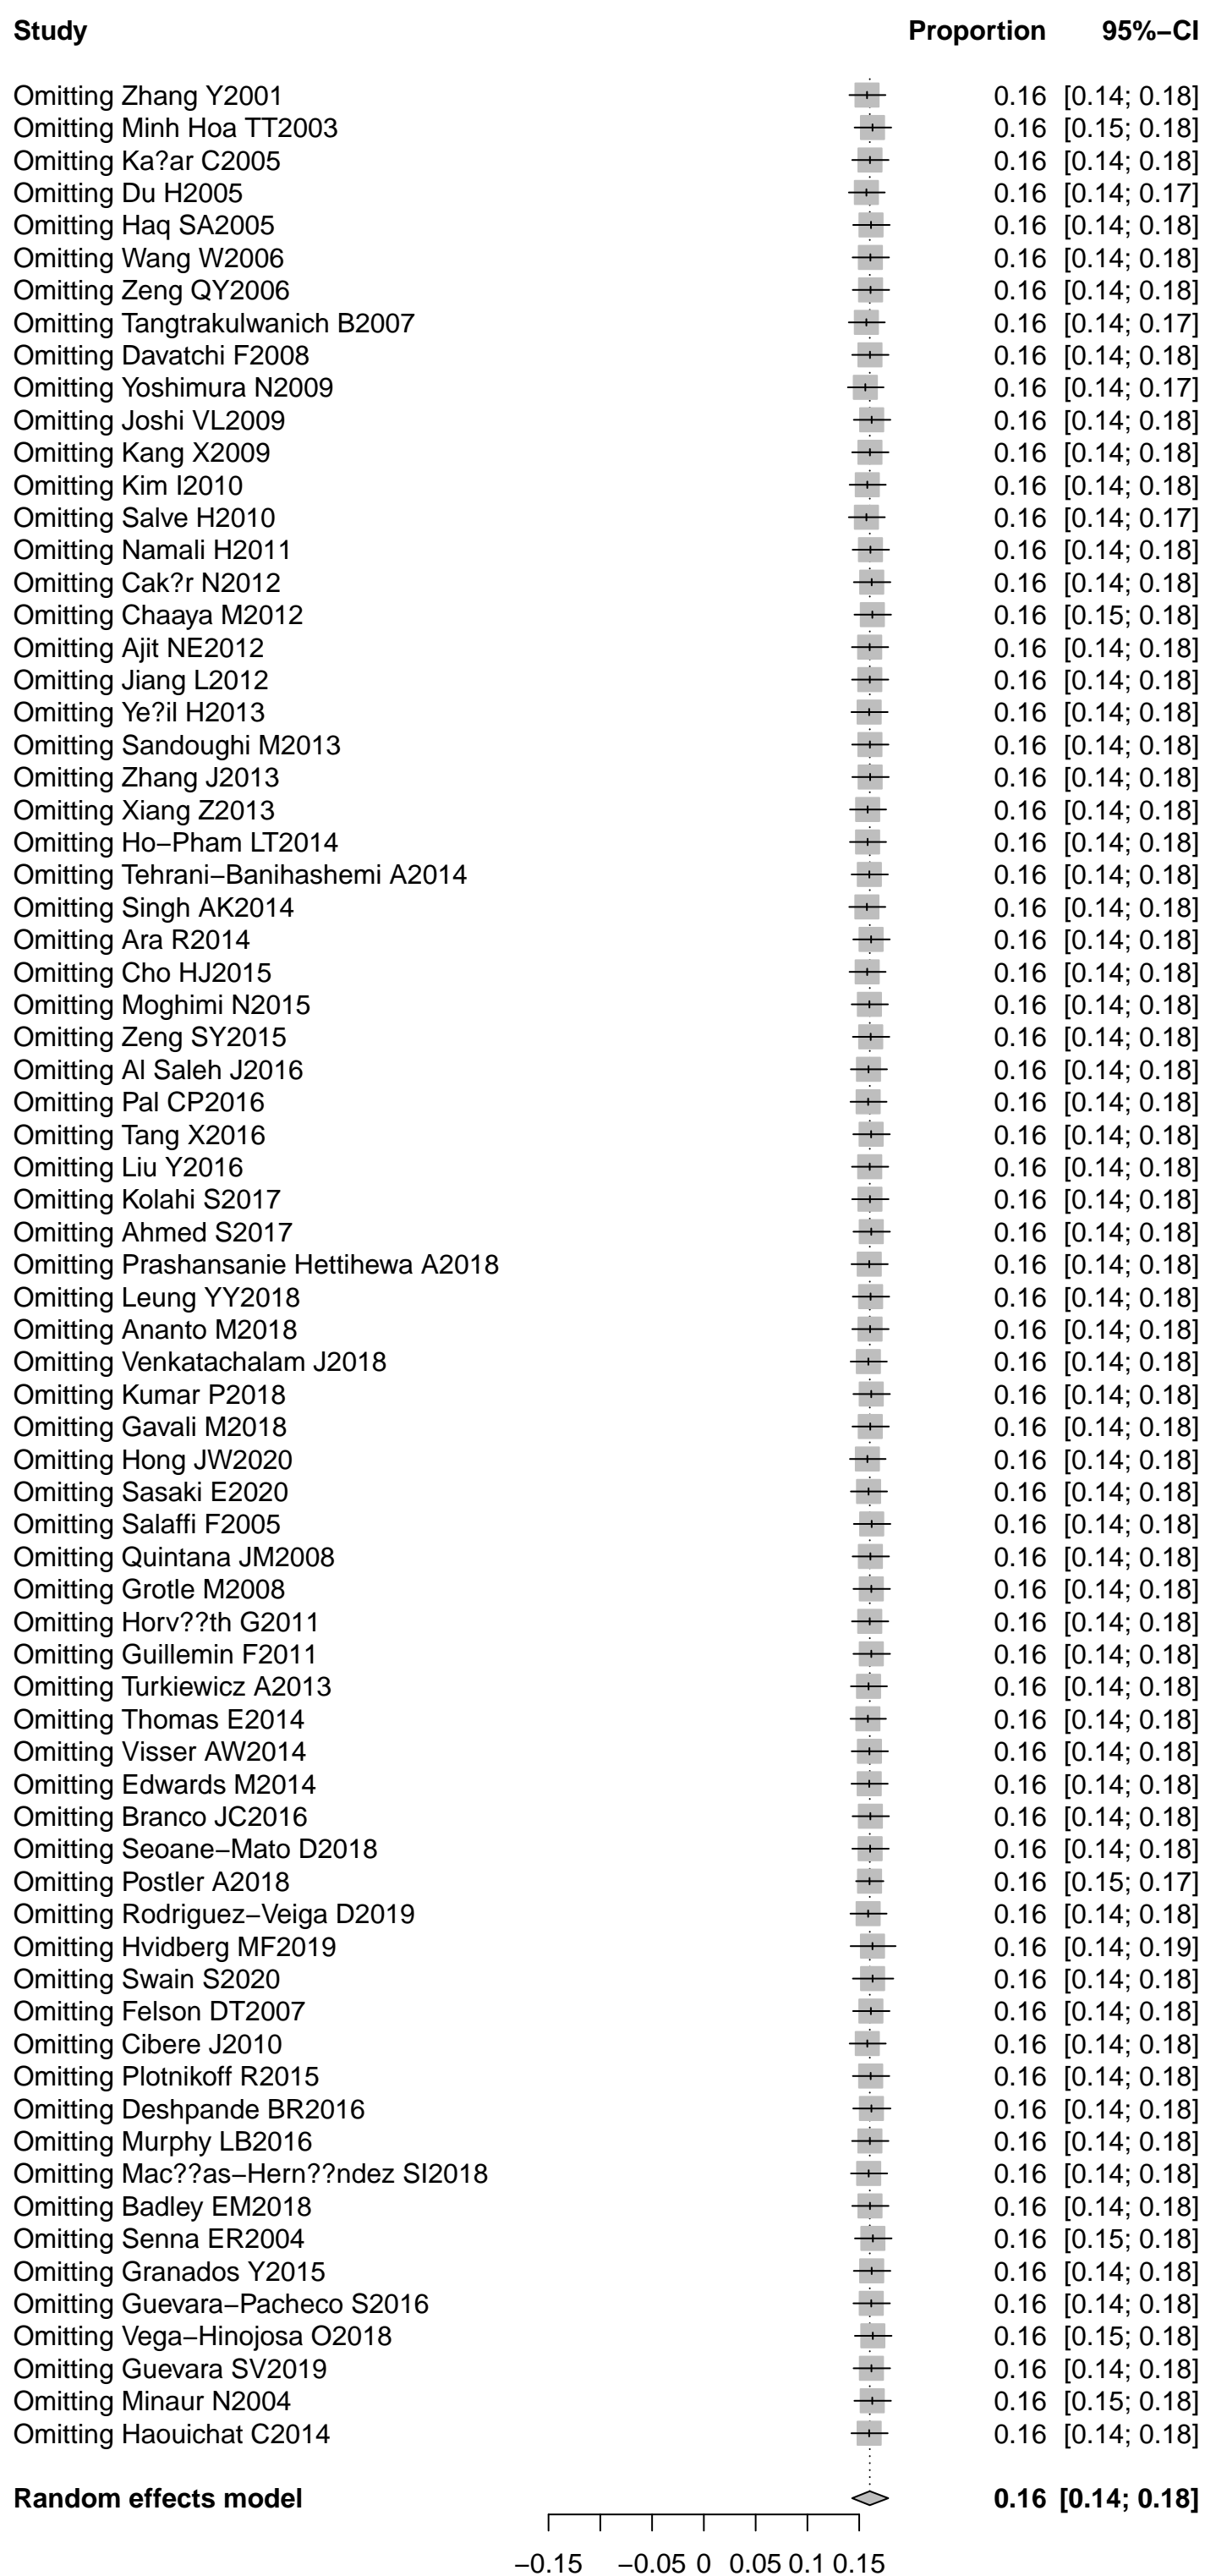

Supplement: mmc24.pdf [file mmc24.pdf]

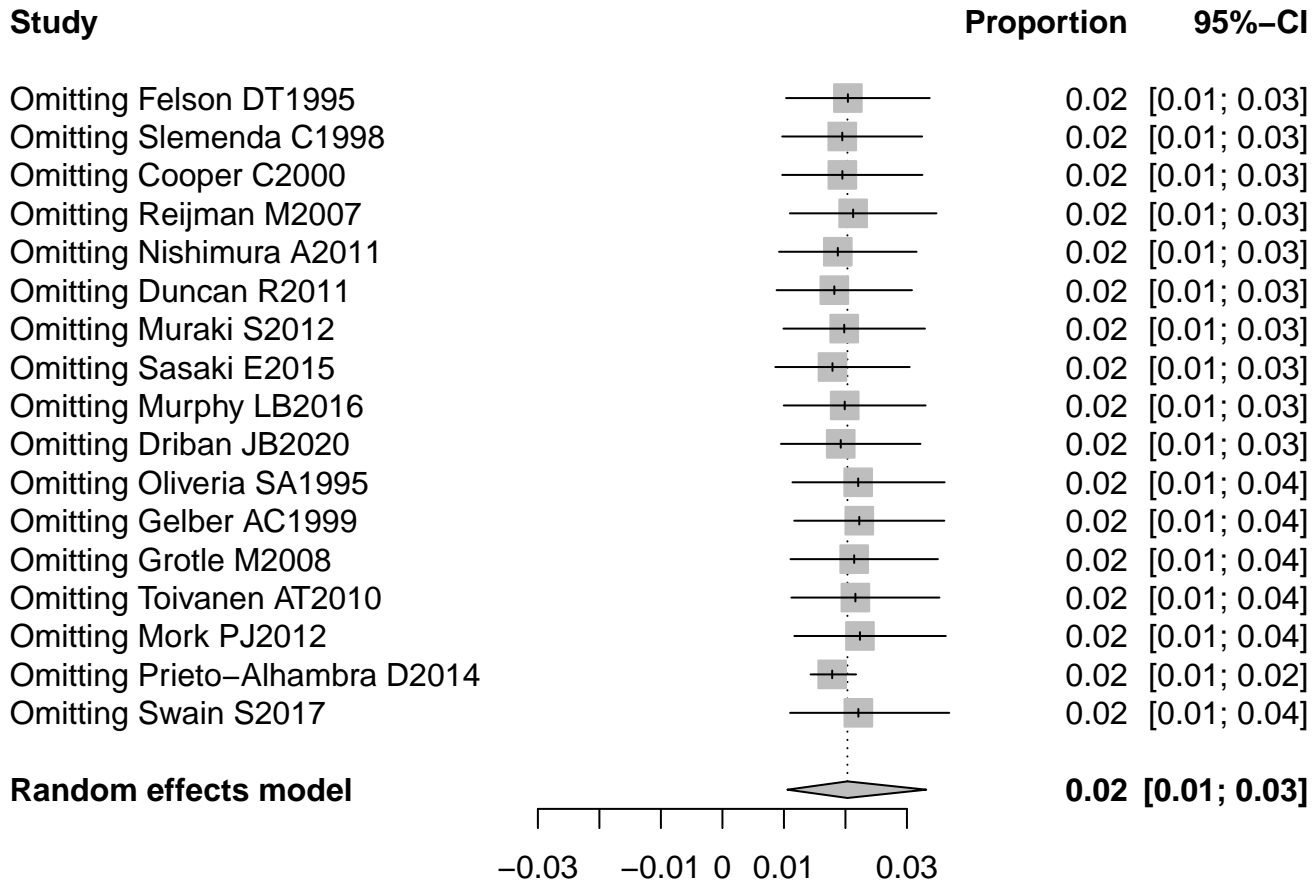

Supplement: mmc25.pdf [file mmc25.pdf]

Funnel plot with pseudo 95% confidence limits

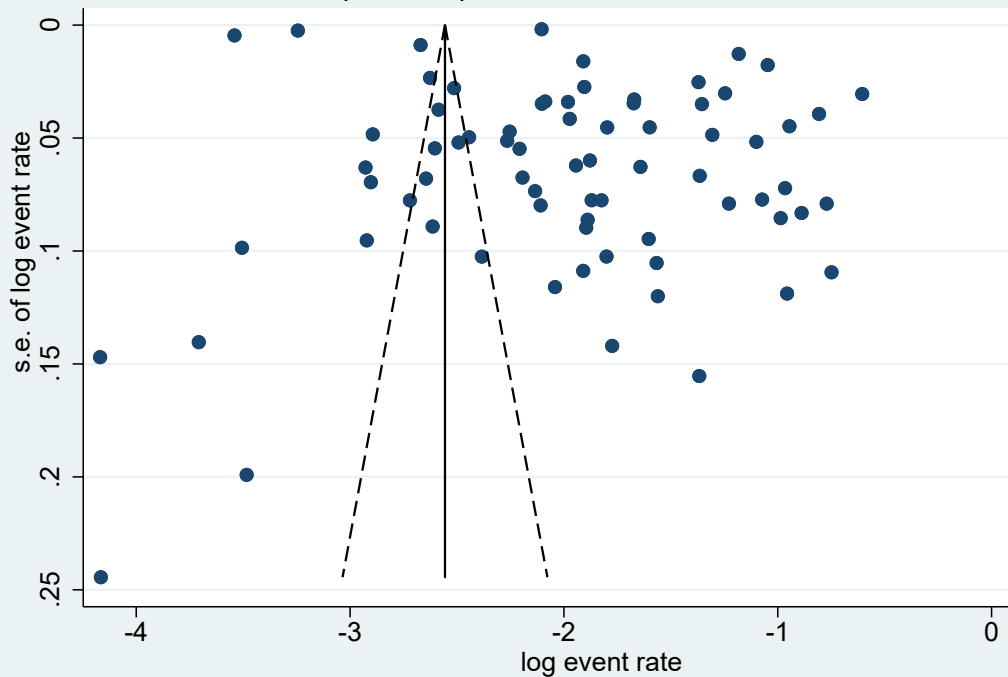

Supplement: mmc28.pdf [file mmc28.pdf]

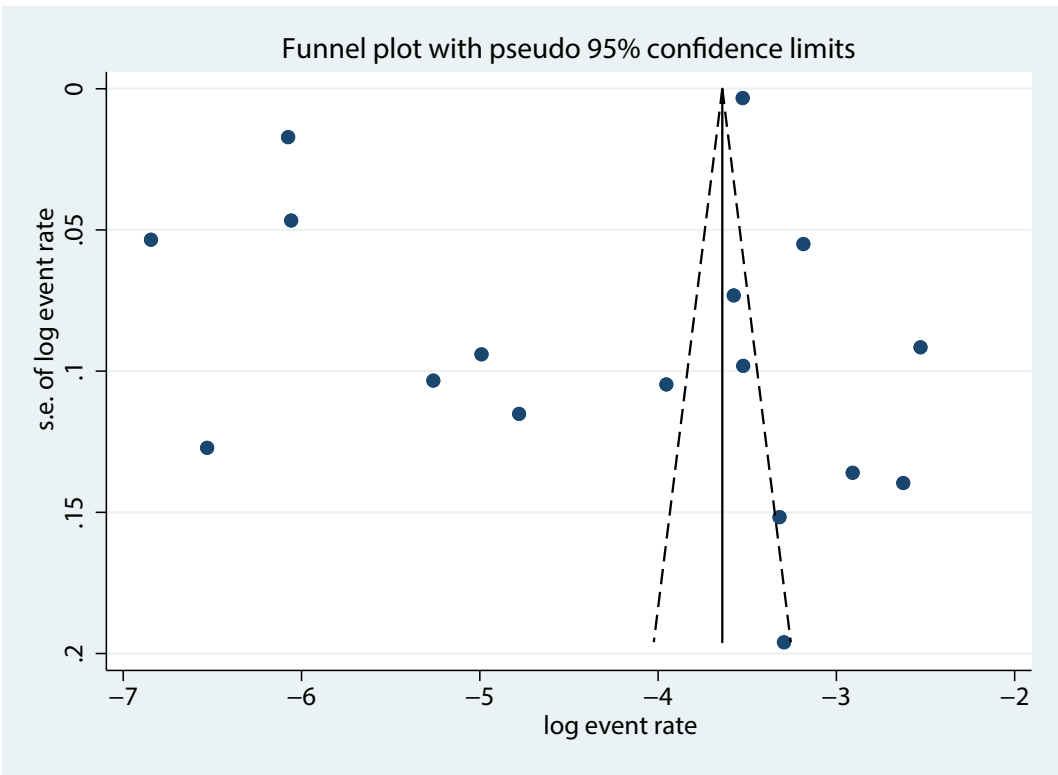

Supplement: mmc29.pdf [file mmc29.pdf]

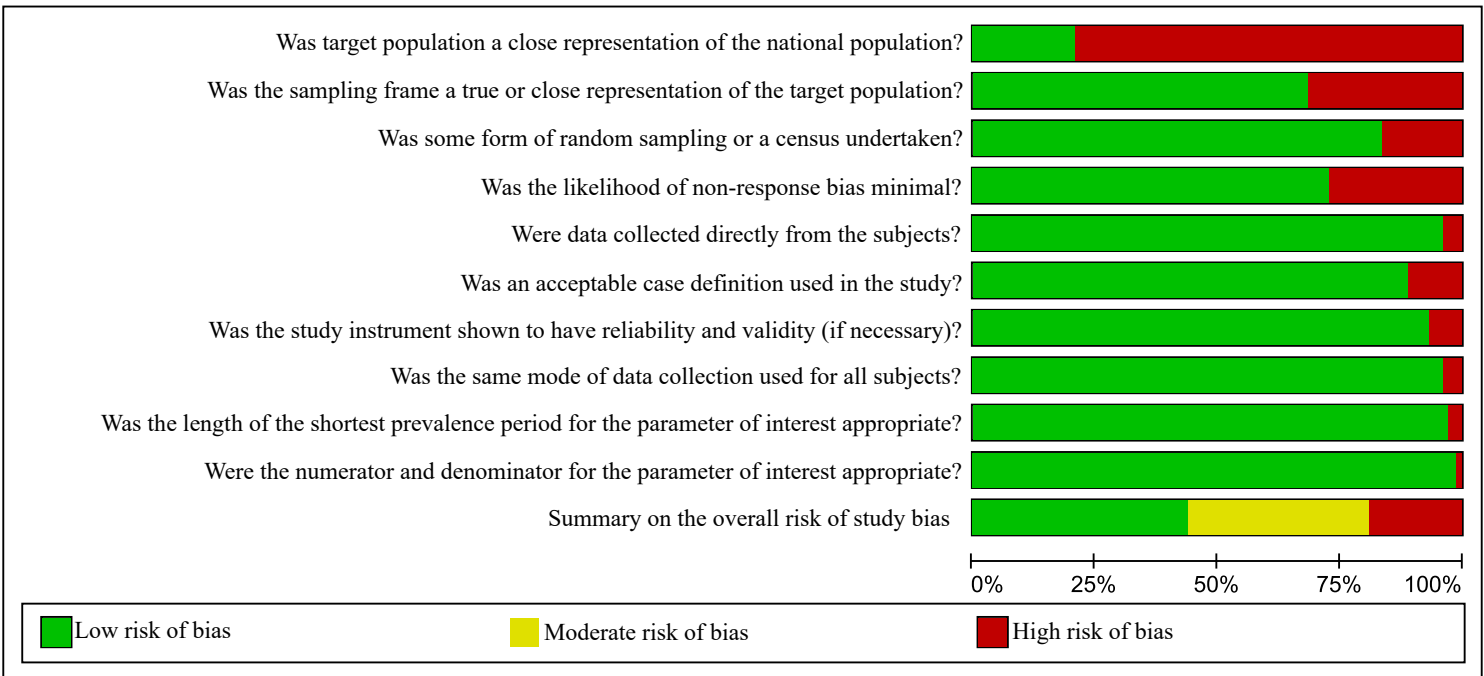

Supplement: mmc3.pdf [file mmc3.pdf]

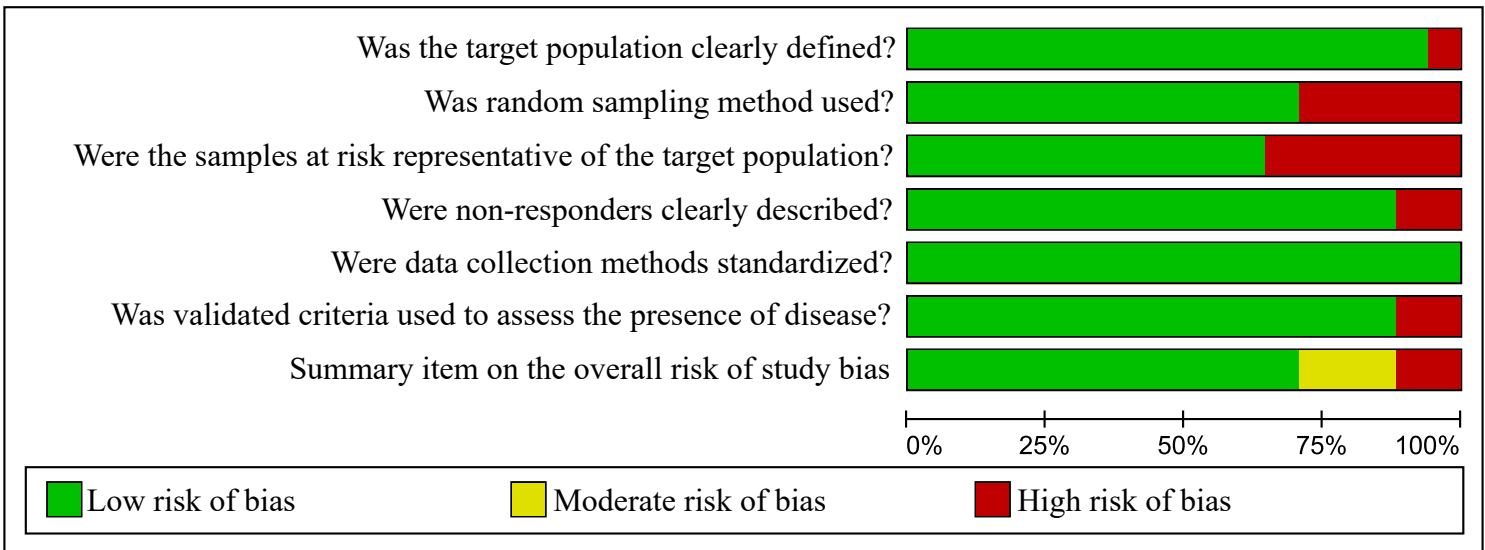

Supplement: mmc5.pdf [file mmc5.pdf]

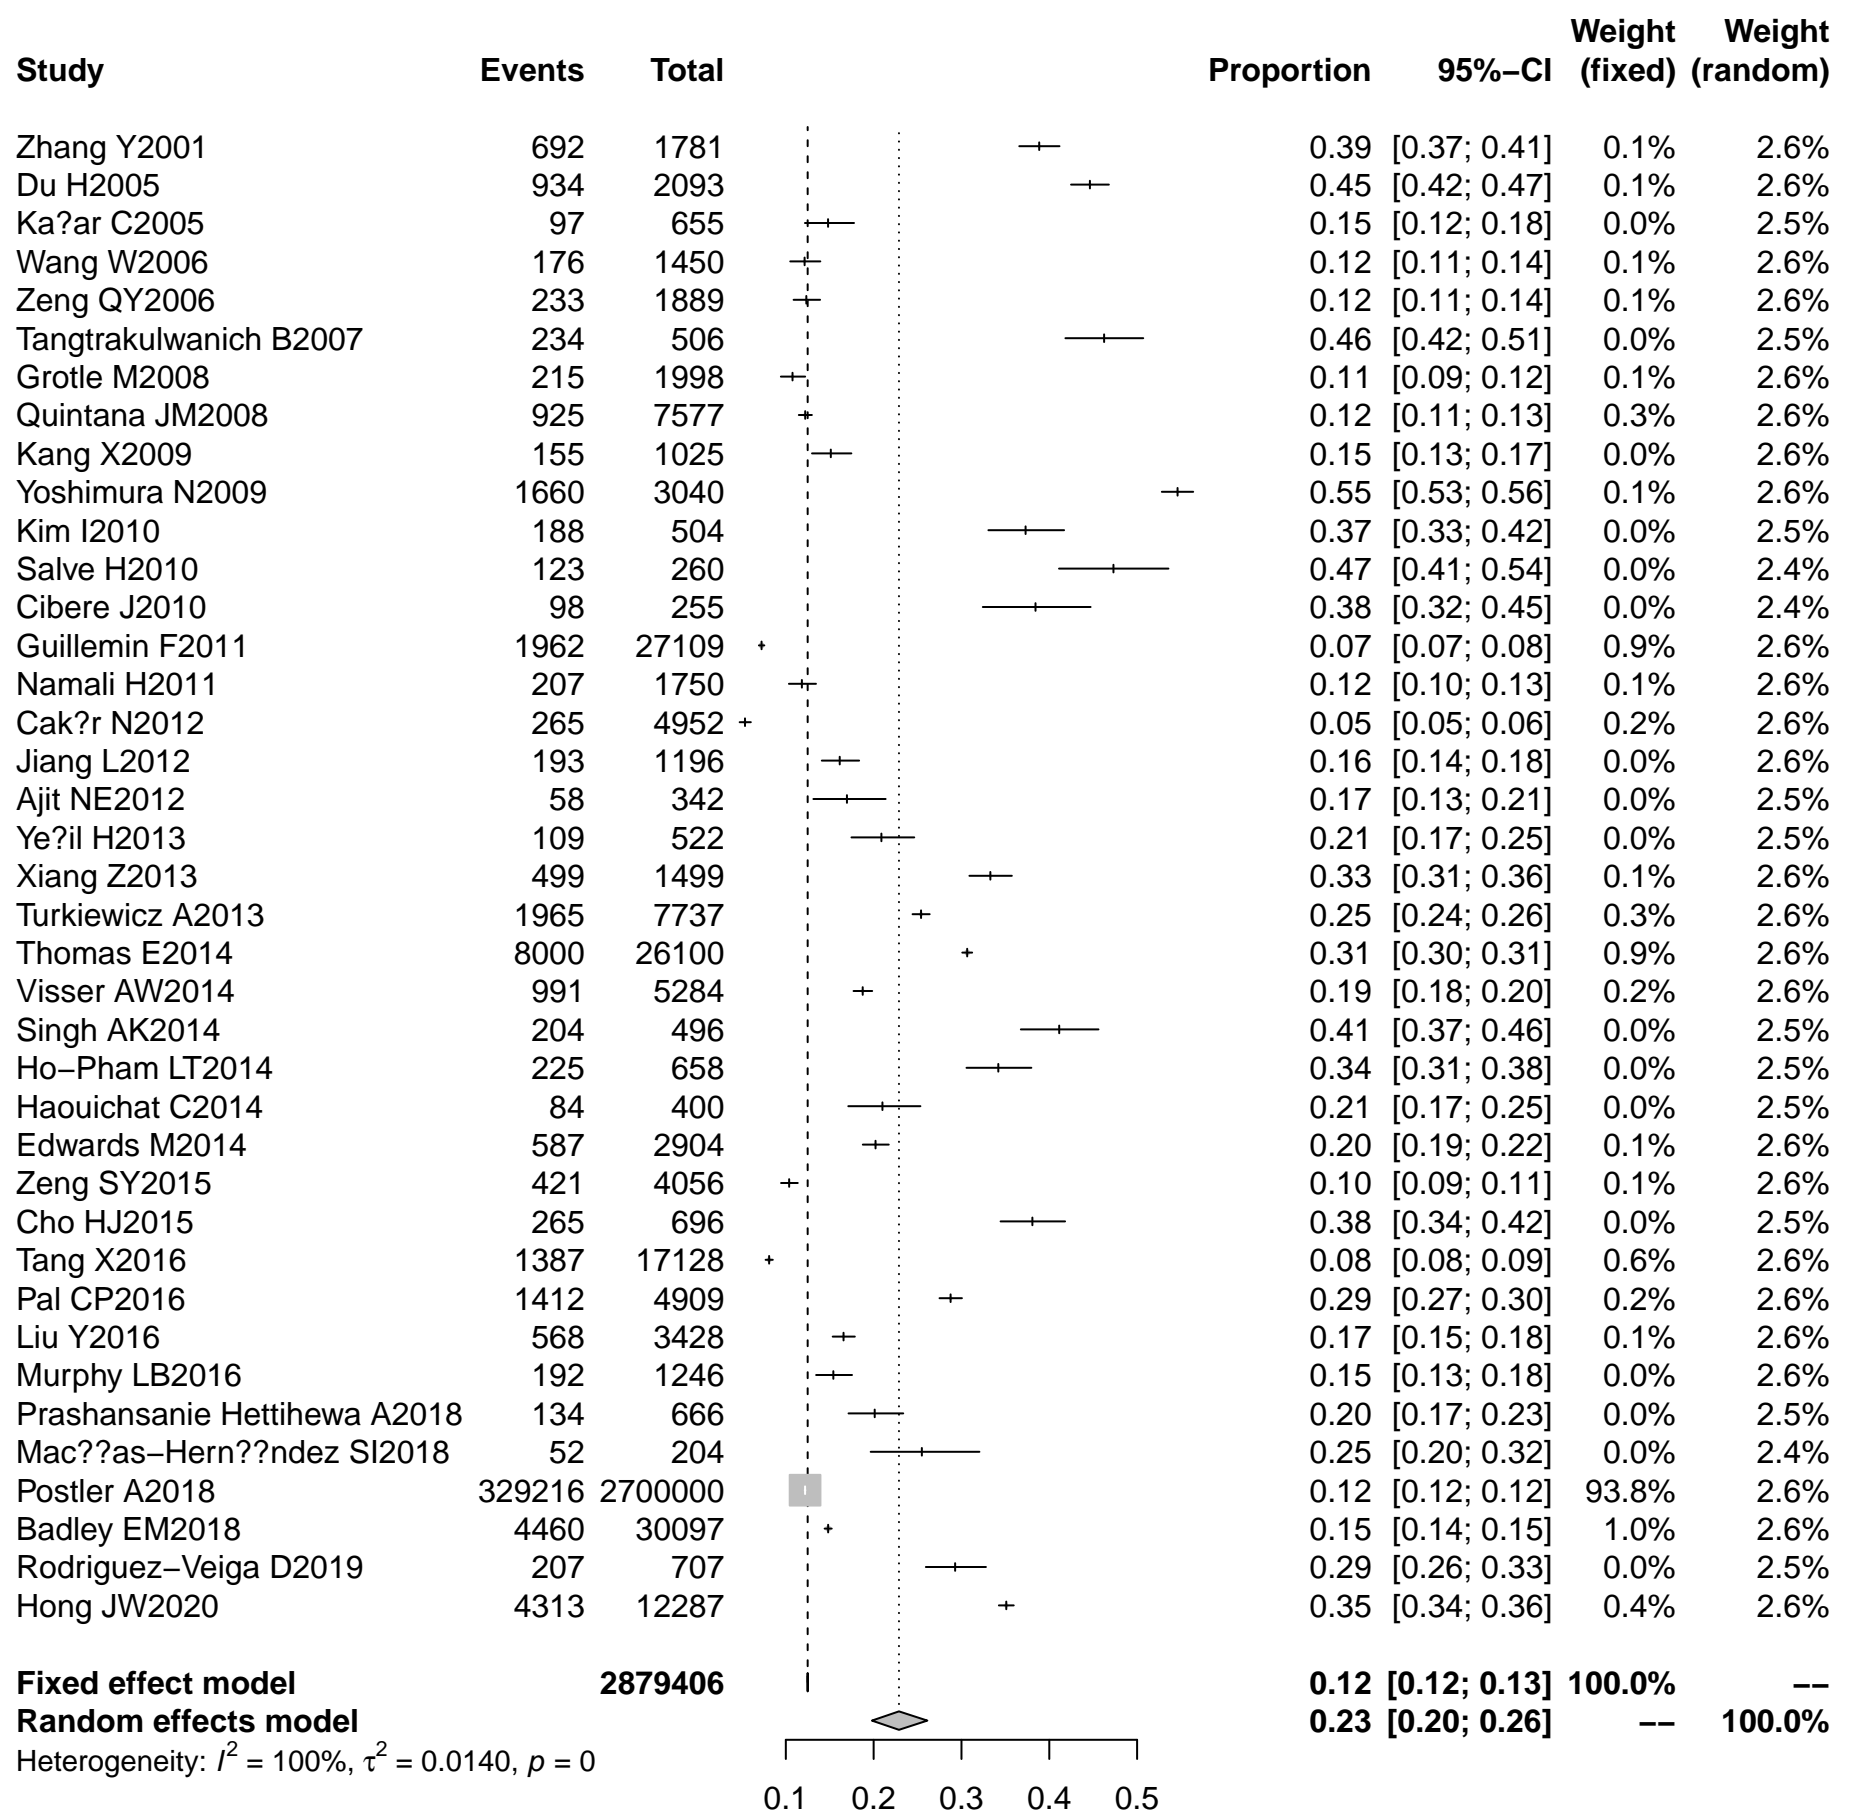

Supplement: mmc6.pdf [file mmc6.pdf]

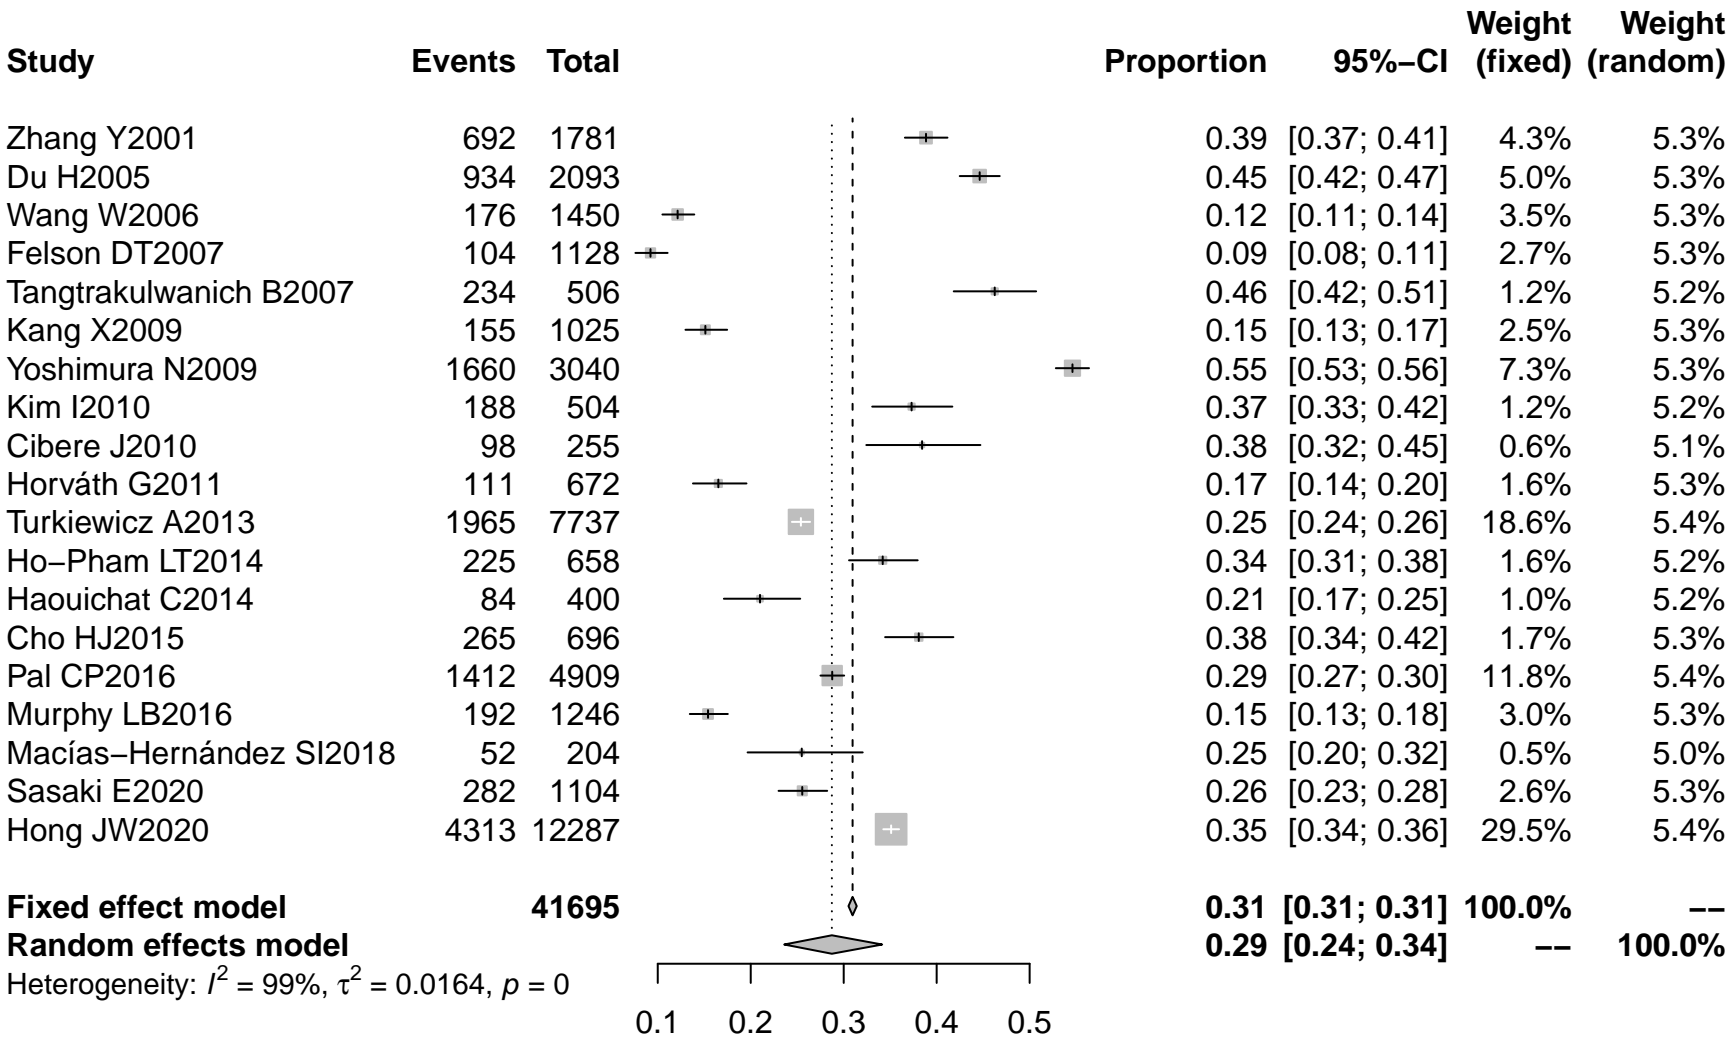

Supplement: mmc8.pdf [file mmc8.pdf]

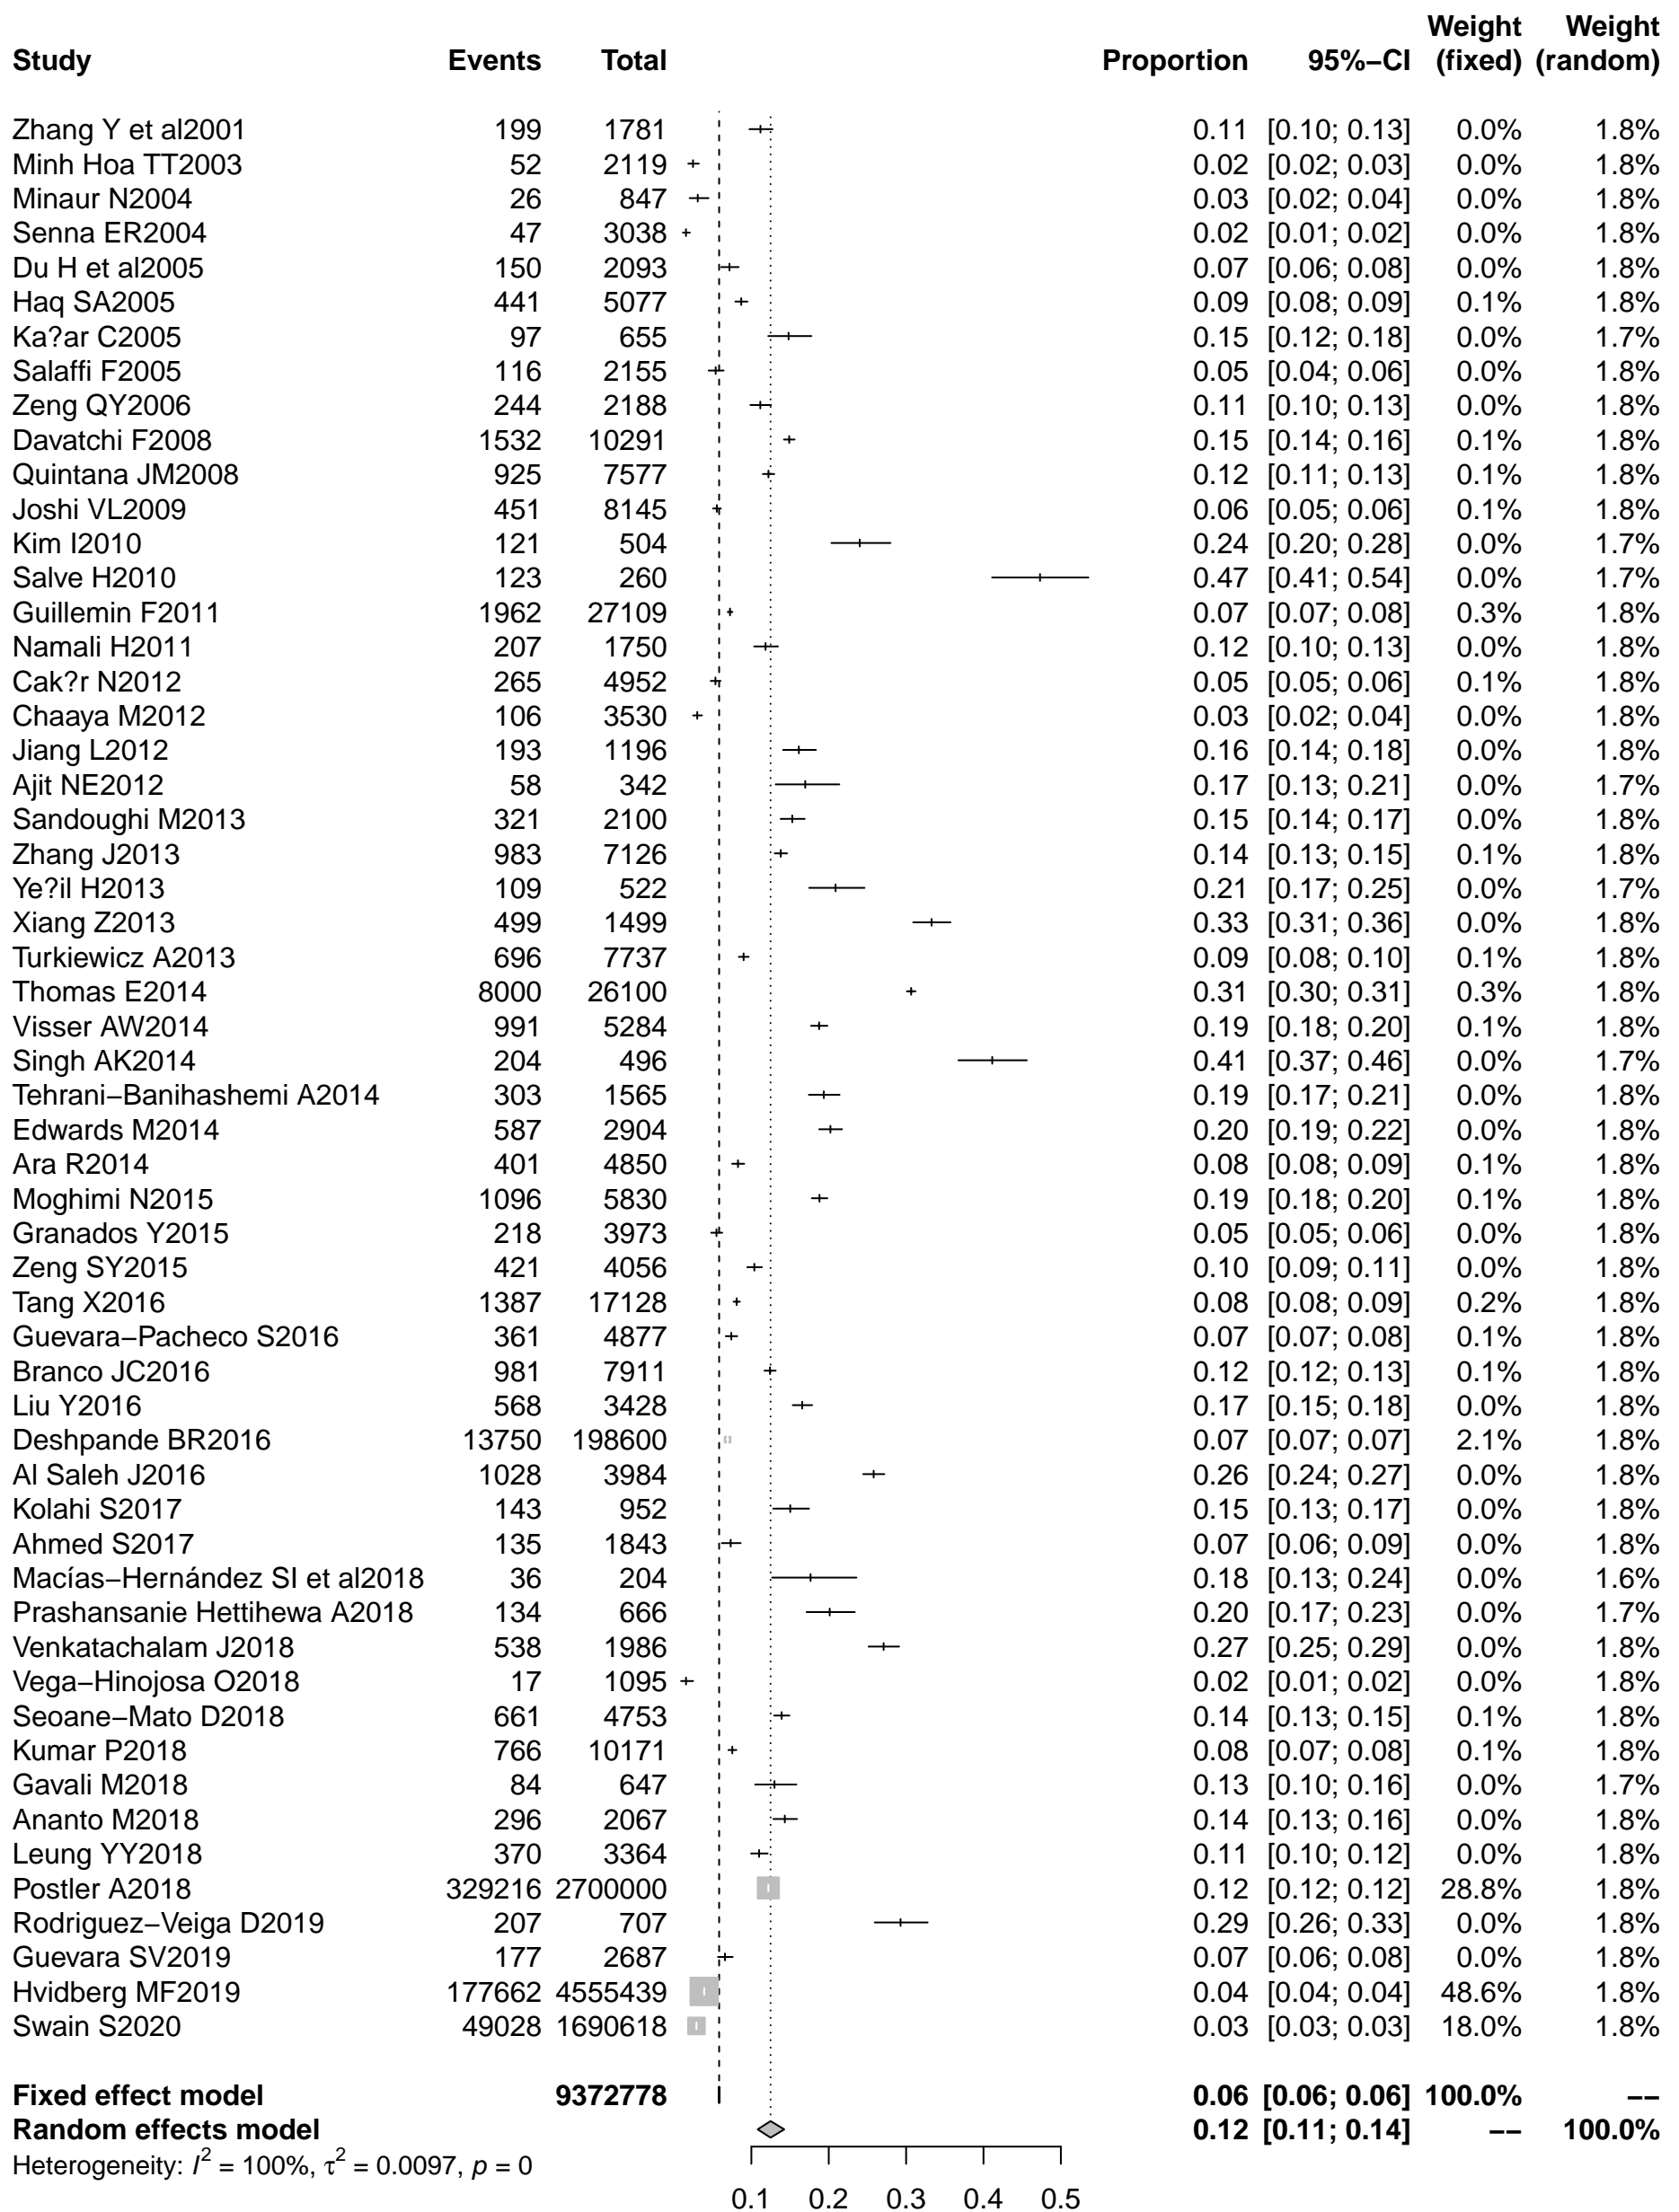

Supplement: mmc9.pdf [file mmc9.pdf]
